# Supplementary material for: Bidirectional Control of Coronary Vascular Resistance by Eicosanoids via a Novel GPCR
Source: Research Square preprint supplement (doi:10.21203/rs.3.rs-506030/v1), 2021-06-02
Supplement: Supplementary file 1 [file 286fd36b72cd2730818b7dc6.docx]

Supplementary Materials for

**Bidirectional Control of Coronary Vascular Resistance by Eicosanoids via a Novel GPCR**

Nabil J. Alkayed*, Zhiping Cao, Zu Yuan Qian, Shanthi Nagarajan, Carmen Methner1,4, Xuehong Liu, Jonathan Nelson, Fuchun Xie, Bingbing Li, Wei Fan, Lijuan Liu, Marjorie R. Grafe, Xiangshu Xiao*, Anthony P. Barnes*, Sanjiv Kaul*

*Correspondence to: S.K. ([kauls@ohsu.edu)](mailto:kauls@ohsu.edu)),

A.P.B. ([barnesan@ohsu.edu)](mailto:barnesan@ohsu.edu)),

X.X. ([xiaoxi@ohsu.edu](mailto:xiaoxi@ohsu.edu)),

or N.J.A. ([alkayedn@ohsu.edu)](mailto:alkayedn@ohsu.edu))

**This PDF file includes:**

- Materials and Methods
- Figs. S1 to S8
- Tables S1 to S3
- References

Materials and Methods

**Photocrosslinking Probe Synthesis**

***4-(Prop-2-yn-1-ylamino)benzenesulfonamide (2)*.** Propargyl bromide (0.75 mL, 10 mmol) was added to a stirred solution of aniline **1** (6.88 g, 40 mmol) in ethyl alcohol (75 mL) at room temperature. The reaction mixture was then heated under reflux for 6 h. The solvent was removed *in vacuo* and the residue purified by flash column chromatography, eluting with dichloromethane-acetonitrile (100:15) to give product **2** (1.5 g, 71%) as a light yellow solid: 1H NMR (400 MHz, DMSO-*d*6) δ 7.55 (d, *J* = 8.8 Hz, 2 H), 6.96 (s, 2 H), 6.73 (t, *J* = 6.2 Hz, 1 H), 6.69 (d, *J* = 9.2 Hz, 2 H), 3.94 (dd, *J* = 6.0, 2.4 Hz, 2 H), 3.11 (t, *J* = 2.4 Hz, 1 H); 13C NMR (100 MHz, DMSO-*d6*) δ 150.87, 131.65, 127.66, 112.09, 81.89, 73.76, 32.13.

***N-(Prop-2-yn-1-yl)-N-(4-sulfamoylphenyl)-4-[3-(trifluoromethyl)-3H-diazirin-3-yl]benzamide (4)****.* Thionyl chloride (2 mL) was added to acid **3** (220 mg, 0.957 mmol) at room temperature. The resulting mixture was then heated under reflux for 1 h. Excess thionyl chloride was removed under reduced pressure and the residue was dissolved with THF (5 mL). Then **2** (168 mg, 0.8 mmol) and NaHCO3 (84 mg, 0.96 mmol) were added to this solution and the mixture was heated under reflux for 2 h. The solvent was removed *in vacuo* and the residue was purified by flash column chromatography, eluting with dichloromethane-acetonitrile (100:15) to give product **4** (300 mg, 88%) as a light yellow solid: m.p. 57-58 oC. 1H NMR (400 MHz, DMSO-*d*6) δ 7.72 (d, *J* = 8.4 Hz, 2 H), 7.46 (d, *J* = 8.4 Hz, 2 H), 7.40 (s, 2 H), 7.39 (d, *J* = 8.0 Hz, 2 H), 7.18 (d, *J* = 8.0 Hz, 2 H), 4.70 (d, *J* = 2.0 Hz, 2 H), 3.24 (t, *J* = 2.2 Hz, 1 H); 13C NMR (100 MHz, DMSO-*d*6) δ 168.45, 144.98, 142.89, 137.24, 129.78, 128.48, 127.16, 126.57, 126.22, 122.09 (1*J*CF = 274 Hz), 79.45, 75.76, 39.43, 28.37 (2*J*CF = 40 Hz).

***N-(4-(N-((5Z,8Z,11Z)-13-(3-Pentyloxiran-2-yl)trideca-5,8,11-trienoyl)sulfamoyl)phenyl)-N-(prop-2-yn-1-yl)-4-(3-(trifluoromethyl)-3H-diazirin-3-yl)benzamide (EET-P).*** EDCI (104 mg, 0.54 mmol) and DIPEA (88 µL, 0.54 mmol) were added to a stirred solution of a mixture containing 1:1 ratio of 14,15-EET and arachidonic acid(130 mg, 0.416 mmol) prepared in DMF (4 mL) at room temperature. The reaction mixture was stirred for 1 h, then compound **4** (228 mg, 0.54 mmol) and DMAP (13 mg, 0.11 mmol) were added, further stirring overnight. The reaction mixture was then diluted with water (10 mL) and 2 N HCl (1 mL). Ethyl acetate (30 mL) was added and the organic layer was separated, washed with brine (20 mL) and dried over Na2SO4. The solvent was removed and the residue was purified by flash column chromatography, eluting with dichloromethane-ethyl acetate (10:1) to give product **EET-P** (25 mg, 17% based on the amount of 14,15-EET in the starting material) as a colorless oil: 1H-NMR (400 MHz, CDCl3) δ 9.45 (brs, 1 H), 7.95 (d, *J* = 8.4 Hz, 2 H), 7.37 (d, *J* = 8.4 Hz, 2 H), 7.25 (d, *J* = 8.6 Hz, 2 H), 7.02 (d, *J* = 8.8 Hz, 2 H), 5.59-5.20 (m, 6 H), 4.67 (d, *J* = 2.6 Hz, 2 H), 3.15-3.05 (m, 2 H), 2.94-2.85 (m, 1 H), 2.82-2.69 (m, 3 H), 2.53-2.44 (m, 1 H), 2.30 (t, *J* = 2.2 Hz, 1 H), 2.25-2.17 (m, 3 H), 2.08-2.00 (m, 2 H), 1.71-1.42 (m, 6 H), 1.40-1.27 (m, 4 H), 0.90 (t, *J* = 7.0 Hz, 3 H); 13C NMR (100 MHz, CDCl3) δ 170.89, 168.64, 147.13, 137.36, 135.42, 131.75, 130.91, 129.86, 129.27, 129.19, 128.52, 128.43, 127.72, 127.28, 126.14, 124.02, 121.78 (1*J*CF = 274 Hz), 78.11, 73.22, 58.40, 57.37, 39.87, 35.65, 31.68, 28.23 (2*J*CF = 42 Hz), 27.58, 26.42, 26.22, 26.18, 25.88, 25.67, 24.02, 22.58, 14.00. ESI-MS for C38H43F3N4O5S+Na: calcd 747.3, found 747.5.

**Photocrosslinking, Click Chemistry and Streptavidin Pulldown**

Adult mouse heart mVSMCs at ~70-80% confluency were washed once with HBSS (Invitrogen), then cells were treated with or without 14,15-EET for 10 min followed by treatment with **EET-P** for 30 min at 37°C. At the end of incubation, the cells were cooled to 4 oC and UV-irradiated at 365 nm for 5 min. The cells were then collected by scraping and pelleted by centrifugation at 1000 rpm for 5 min. The cell pellets were washed once with ice-cold PBS. The washed cell pellets were lysed in 1% SDS/PBS with brief sonication followed by centrifugation at room temperature at 14000x rpm for 10 min. The protein concentration of the supernatant was determined by BCA Protein Assay Kit (Pierce). The crude lysates were adjusted with PBS to give a final concentration of ~1.0 mg/mL for click reaction with rhodamine-azide or biotin-azide using the following condition: azide (50 μM), TCEP (1 mM), TBTA (100 μM), CuSO4 (1 mM). The mixture was incubated with shaking at room temperature for 1.5 h in the dark. For rhodamine conjugation, the reaction mixture was mixed with 2X SDS-PAGE buffer and loaded directly for in-gel fluorescent gel analysis. For biotin conjugation, the reaction mixture was further processed as follows for streptavidin pulldown and protein identification. An equal volume of MeOH and 0.25 volume of CHCl were added to the mixture. The reaction mixture was again vigorously vortexed for 30 s and centrifuged at 8000x g for 10 min. The supernatant was removed and the protein solid was washed three times with MeOH: CHCl3 (1:1). Then MeOH was added to the washed solid and briefly sonicated to resuspend the solid. CHCl3 was added to a final of MeOH:CHCl3 (4:1). The mixture was vigorously vortexed for 30 s and centrifuged at 14000x rpm for 10 min to pellet the solid. The resulting protein solid was redissolved in PBS with 8 M urea and 2% SDS with brief sonication. The solution was centrifuged at 14000x rpm for 10 min to remove any insoluble pellet. The proteins in the supernatant were reduced with DTT (10 mM) at 55 oC for 30 min followed by alkylation with iodoacetamide (25 mM) for 30 min at room temperature in the dark. The solution was diluted 10x with PBS and mixed with PBS-washed streptavidin-agarose beads. The mixture was tumbled at room temperature for 2 h. Then the beads were pelleted by centrifugation at 700x g for 2 min. The beads were extensively washed by 3x 1% SDS/PBS followed by 6x PBS. The beads were incubated with 100 mM NH4HCO3 with 2 M urea supplemented with 1 mM CaCl2 and 2 μg sequencing grade trypsin (Sigma) at 37 oC overnight. The tryptic peptide mixture was collected with a Spin-X centrifuge tube filter. They were further washed with 2 x 200 μL 100 mM NH4HCO3 with 2 M urea. The tryptic peptide mixture and washes were combined, 0.3ml of 1%TFA added, and final volumes adjusted to 2 ml with water. Digests were then desalted and urea removed by solid phase extraction using Oasis HLB 1cc cartridges (Waters, Product Number WAT094225) and dried by vacuum centrifugation.

**Protein Mass Spectroscopy**

Peptides were dissolved in 42 μl of 5% formic acid, and 40 μl of the solution was analyzed by liquid chromatography/tandem mass spectrometry using a NanoAcquity Ultra performance liquid chromatography (UPLC) system (Waters) and LTQ Velos dual-pressure linear ion trap mass spectrometer (Thermo Scientific). Electrospray ionization was performed with a Captive Spray source (Microm Biosciences) fitted with a 20-μm- inner-diameter tapered spray tip and a 1.0-kV source voltage. Xcalibur version 2.1 was used to control the system. Samples were applied at 15 μl/min to a Symmetry C18 trap cartridge (Waters) for 10 min and then switched to a 75um x 250mm BEH130 C18 column with 1.7um diameter particles (Waters) using mobile phases of water (phase A) and acetonitrile (phase B) containing 0.1% formic acid, a 7.5% to 30% acetonitrile gradient over 60 min, and a 300 nL/min flow rate. A normalized collision energy level of 30 was used. Data-dependent collection of MS/MS spectra used the dynamic exclusion feature of the instrument’s control software (repeat count = 1, exclusion list size of 500, exclusion duration of 24 s, and exclusion mass width of -1 to +1.5) to obtain MS/MS spectra of the 10 most abundant parent ions (minimum signal of 5,000) following each survey scan from *m/z* 400 to 1,400. The tune file was configured with no averaging of microscans, a maximum injection time of 200 ms for survey scans (100 ms for MS2 scans), and automatic gain control targets of 3 x 104 in MS1 mode and 1 x 104 in MS2 mode. Comet {Eng, J.K., Jahan, T.A. and Hoopmann, M.R., 2013. Comet: an open‐source MS/MS sequence database search tool. Proteomics, 13(1), pp.22-24} (version 2016, release 03) was used to search MS2 spectra against a UniProt canonical reference mouse proteome FASTA protein database (release 2019.04 with 22,287 sequences), with concatenated sequence-reversed entries to estimate peptide and protein false discovery rates, and 179 common contaminant sequences and their reversed forms. The search results processing was performed with Python scripts (https://github.com/pwilmart/PAW_pipeline.git) that have been described previously {Wilmarth, P.A., Riviere, M.A. and David, L.L., 2009. Techniques for accurate protein identification in shotgun proteomic studies of human, mouse, bovine, and chicken lenses. Journal of ocular biology, diseases, and informatics, 2(4), pp.223-234.}. Searches for all samples were performed with trypsin enzyme specificity. The average parent ion mass tolerance was 2.5 Da. The monoisotopic fragment ion mass tolerance was 1.0005 Da. A static modification of +57.02 Da was added to all cysteine residues. A variable modification of +16 Da on methionine residues was also allowed, with a maximum of 3 modifications per peptide. Comet scores were combined into linear discriminant function scores to improve the identification sensitivity, and discriminant score histograms were created separately for each peptide charge state (1+, 2+, and 3+). Separate histograms were created for matches to forward sequences and for matches to reversed sequences for all peptides of 7 amino acids or longer. Scores of histograms for reversed matches were used to control peptide-spectrum match (PSM) false-discovery rates (FDR) to 3% and that achieved an estimated protein FDR of 0.5% when requiring a minimum of two distinct peptide matches per protein.

**Isolated Pressurized Mesenteric Artery Preparation**

Mesenteric arteries were isolated from the mesenteric vascular bed following cervical dislocation of anesthetized, 3-months old C57BL6 mice and placed in ice cold standard MOPS buffer solution containing in mM: 144 NaCl, 3.0 KCl, 2.5 CaCl2, 1.5 MgSO4, 2.0 MOPS, 5.0 glucose, 2.0 Pyruvate, 0.02 EDTA, 1.2 NaH2PO4. The mesenteric arteries (1-2 mm in length) were secured in an arteriograph perfusion chamber (Living Systems Instrumentation (LSI), Burlington, VT) between two glass micropipettes. The ends of glass micropipettes were connected to a pressure servo controller unit (LSI, PS200S) through three-way stopcocks. The cannulated vessel was pressurized to 80 mmHg and superfused with MOPS buffer solution. The vascular diameters were monitored by a video system consisting of an inverted microscope (Leica Dm IRB) with a CCD camera (Ikegami), a television monitor and a Video Dimension Analyzer (LSI). The vessel diameter signal was digitized (Digidata 1440A digitizer, Axon Instruments) and recorded (AxoScope software, Axon Instruments). The temperature of perfusion chamber was maintained at 37°C using temperature controllers (LSI, TC-095, and Warner TC-344B). After equilibration, the arteries were pre-contracted with a thromboxane A2 receptor agonist, U-46619 (20-40 nM) to 26-56% of baseline diameter, then exposed to cumulative concentrations of 14,15-EET-P (1, 3, 10 µM). The data were expressed as % relaxation relative to contraction by U-46619.

**Computational Modeling**

***Fingerprint Similarity Search****.* Ligand similarity searching of 14,15-EET was performed against HMDB long-chain fatty acids database (*1-3*) containing 38928 entries. The protocol involves extended-connectivity fingerprints (ECFPs) available in Canvas V2.1 (*4*) (Schrödinger, LLC, New York, NY, 2013). The ECFPs are radial topological fingerprints encoding a molecule into several unique substructure identifiers. The similarity index (SI) between query and database molecules is expressed through tanimoto coefficient (TC). The degree of similarity is calculated by common bits of two molecules (intersection) divided by the total number of bits (union). Top scoring 100 similar molecules were further subjected to k-means clustering, resulting in 10 different clusters. The fourth cluster consisted of 14,15-EET and other molecules in Extended Table 1.

***Model generation****.* GPR39 is a 453-amino acid long GPCR protein with no experimentally determined structure. The recently crystallized neurotensin receptor 1 protein (*5*) (PDB: 4GRV) structure was used as a template. The two proteins share 33.1% identity at aligned regions (Table S3). Intracellular loop (ICL-3) and C-terminal regions were not modeled since they were missing in the template. An additional disulfide bond was reported at the extracellular site between N-terminal C-11 and extracellular loop (ECL-2) C-191, a unique feature among known GPCRs. Classical (TM3.50 and ECL-2) and additional disulfide bonds were used as a constraint during the model generation process using MODELLER V9.14 program (*6*). A total of 1,000 models were generated and the top energetically feasible model was used for subsequent molecular dynamics simulation.

***Molecular Dynamics Simulation****.* Molecular dynamics simulation (MDs) was performed using NAMD 2.10 (*7*) package with CHARMM36 force-field (*8*). The protein structure was subjected to REDUCE (*9*) protonation state prediction; HIS protonation was assigned as per the prediction. We found that deprotonated His-111(0) from TM3 makes TM2 to curve inward, thereby occluding the minor binding pocket. On the other hand, doubly protonated histidine(+) promotes salt-bridge formation with TM2 Glu-90(-); thus preventing TM2 bending. CHARMM-GUI (*10*) membrane builder interface was used to prepare the protein in heterogeneous solvation environment including POPC lipid-bilayer and TIP3 water molecule. 15 Cl- ions were added to neutralize the MD system. Short-range non-bonded interactions were truncated between 10.0 and 12.0 Å by force-based switching to speedup Lennard–Jones potential calculation. Non-bonded list generation was set to 16 Å and was updated heuristically. Particle Mesh Ewald (PME) was used to treat long-range electrostatics. Covalent bonds involving hydrogen atoms were constrained using the SHAKE method (*11*). Langevin dynamics maintains a constant temperature at 303.15 K, and modified Nosé-Hoover method keeps the pressure at 1 atm. The simulation calculation includes crystal images. The system was energy minimized for 10,000 steps, and subsequent equilibration was performed in six steps, during which harmonic restraints were applied to keep the membrane in the Z direction, to prevent water molecules entering into the membrane and to ensure protein/ion equilibration is gradual. Force constants for harmonic restraints were gradually reduced at every step of equilibration. The first two steps of equilibration were conducted at NVT ensemble, the rest were at NPAT to achieve an energetically equilibrated system for the final production run. A total of 350 ps equilibration runs were considered, followed by a production run with an integration time of 2 fs removing all harmonic restraints resulting in the NPT ensemble. A total of 100 ns simulation was performed. Trajectories were saved every 5 ps, first 20 ns of simulation data were considered as an additional equilibration. CHARMM package was used to analyze the trajectories.

***Ligand Modeling****.* We observed the minor binding pocket opening during simulation as salt-bridge formation between His-111 and Glu-90 residues. The final snap-shot from 100ns simulation trajectory was considered for the induced-fit docking (IFD) (*12, 13*) to model 14,15-EET and other long-chain fatty acids revealed from the database. The extensive IFD protocol considers possible binding pose generation to ligand and the corresponding conformation changes to the protein binding-site. The docking score available in GLIDE (*14-16*) V6.4 (Schrödinger, LLC, New York, NY, 2013) was considered to explain the binding pose.

**HEK-293 Cell Transfection with GPR39**

Human Embryonic Kidney-293 cells (HEK 293; American Type Culture Collection, Manassas, VA) were grown in Dulbecco’s modified Eagle’s medium (DMEM; Invitrogen) supplemented with 10% fetal bovine serum (FBS). Cells were maintained in 5% CO2 at 37°C, grown for three passages after thawing and used through passage 12. Cells grown in 12-well plates were transfected using 2.5 μg GPR39 plasmid and Lipofectamine 2000 reagent (Invitrogen) at 50–70% confluence in media lacking antibiotics. Cells transfected with transfection solution alone without the plasmid served as controls. For subsequent experiments, untransfected and transfected HEK-293 cells were treated for 1 to 5 min with different concentrations of epoxyeicosatrienoates (EETs) and hydroxyeicosatetraenoates (HETEs) dissolved in dimethyl sulfoxide (DMSO) or DMSO alone.

**Dot-Blot Assay**

EETs and HETEs regioisomers were dissolved in DMSO, diluted in different concentrations with TBS and blotted onto nitrocellulose membranes, which were allowed to dry at room temperature for 1 hour. Membranes were blocked with LiCor Odyssey Blocking Buffer (Part No 927-50000) for 1 hour, then incubated overnight with cell lysis proteins (in a ratio of 1 ml of cell lysis collected from a T-75 flask plus 9 ml LiCor blocking solution) or in presence of EETs and HETEs regioisomers. Membranes were washed 3 times with TBST, incubated with anti-HA tag antibody (Cell Signaling Technology, Cat # 2367S) for 2 hours at room temperature or overnight at 4 oC.  Membranes were then washed again 3 times with TBST, incubated with a secondary antibody (LiCor, Cat # 925-32210) for 1 hour. After a final wash, the blot was developed and analyzed using the LiCor Odyssey Clx system.

**Microvascular Smooth Muscle Cell (mVSMC) Culture**

After removing the atrium, aorta and large vessels from the heart surface of adult mice (20-25 g), the left ventricle was sliced with mouse heart slicer matrix (Zivic Instruments, Pittsburgh, PA). To avoid epicardial coronary arteries, only 4 apical slices (1 mm thick) from the left ventricle were collected and placed on the surface of a collagen-coated 24-well tissue culture plate (Life Technologies, Carlsbad, CA) containing 100 µl FBS/well. The slices were incubated at 37 0C with 5% CO2 for 4 h before DMEM (supplemented with 100 U/mL penicillin, 100 μg/mL streptomycin and 10% FBS) was added to the wells. The sections were removed after mVSMCs migrated from tissue to the surface of the well. mVSMCs were trypsinized (0.05%) and re-plated for subsequent experiments.

**Western Blot**

Cells (mVSMC and HEK-293) were lysed in buffer (50 mM Tris (pH 7.4), 150 mM NaCl, 1% NP-40, 0.25% Na-deoxycholate, 1 mM ethylenediaminetetraacetic acid, and protease inhibitor (Roche, Nutley, NJ). mVSMC or HEK proteins (20 µg/lane) in SDS sample buffer (2% SDS, 10% glycerol, 80 mM Tris, pH 6.8,0.15 M β-mercaptoethanol, 0.02% bromphenolblue) were separated on 4-12% SDS–polyacrylamide gels and transferred to polyvinylidene difluoride membranes. The membranes were blocked with 5% nonfat dry milk in TBST (10 mM Tris, pH 7.5,150mM NaCl, 0.05% Tween 20) for 30 min at room temperature and incubated overnight at 4 0C with primary antibodies in dry milk as follows: 1:1000 rabbit anti-GPR39 antibody (Antibodies-online.com, Atlanta, GA), 1:1000 HA-Tag mouse mAb (Cell Signaling Technology, Beverly, MA), 1:1000 rabbit anti-ERK (Cell Signaling), and 1:1000 mouse anti-pERK (Cell Signaling). The antigens were detected by the luminescence method (ECL-plus Western blotting detection kit) with peroxidase-linked anti-rabbit or anti-mouse antibodies (GE Amersham, Lafayette, CO). The antigens were detected by the luminescence method (ECL-plus Western blotting detection kit) with peroxidase-linked anti-rabbit or anti-mouse antibodies (GE Amersham). To reprobe, membrane stripping was carried out by incubatingmembranes in stripping buffer (37.5 mM Tris, pH 6.8, 2% SDS, 1% β-mercaptoethanol at 50 °C for 60 min. Stripped membranes werewashed three times with TBST followed byimmunoblotting with 1:2000 mouse anti-actin monoclonal antibody (Millipore, Temecula, CA). In each case, the intensity of immuoblot bands was detected and quantified using the Fluor Chem FC2 Image Analysis System (Alpha Innotech).

**Real-Time Quantitative Polymerase Chain Reaction (qPCR)**

RNA samples from mVSMC and HEK-293 cells were treated with RNase-free DNase I (Invitrogen) for 30 min at 37 °C. Reverse transcription was performed with iScriptTM reverse transcription supermix for RT-qPCR (Bio-Rad, Hercules, CA). Fluorescent signals were generated using Fast SYBR Green PCR Master Mix (Applied Biosystems). We used the Roche real-time PCR primer design software to generate the primers for GPR39 and β-actin. The specificity of these primers was confirmed by BLAST analysis against GenBank database. qPCR for GPR39 and β-actin were run in triplicates on a Bio-Rad CFX96 real time PCR system as follows: 20s at 95°C, followed by 40 cycles of 3s each at 95°C, then 30s at 60°C. A melting curve analysis was performed at the end of the PCR cycles. Experimental controls included non-reverse-transcribed RNA samples. Data were analyzed by Bio-Rad CFX96 software to determine the threshold cycle (CT) for each reaction.

**Immunofluorescent Staining**

For immunocytochemistry (ICC), cultured cells (mVSMCs and HEK) were fixed in fresh 4% paraformaldehydein PBS (0.1 M sodiumphosphate buffer, 0.9% NaCl, pH 7.4) and subsequently blocked with 10% goat serum in PBS for 30 min, and then stained with rabbit anti-GPR39 antibody (targeting the 3rd extracellular domain of GPR39, Antibodies-online.com, Atlanta, GA). Alexa 488-conjugated donkey anti-rabbit secondary antibody (Life Technologies) was used to visualize primary antibodies. For Immunohistochemistry (IHC), mouse hearts were perfusion-fixed through the aorta with PBS and 4% paraformaldehyde using HSE Type 801 Perfusion System (Hugo Sachs Elektronik-Harvard Apparatus). Hearts were then cryoprotected in20% sucrose in PBS overnight at 4°C.Frozen sections were cut at 10 µm on a cryostat. Sections were washed with PBS, blocked in normal goat serum (Sigma) at a concentration of 10%in PBS for 90 minutes, and then stained with rabbit anti-GPR39 antibody and mouse anti-αSMA monoclonal antibody for 24 hours at 4°C with mild agitation.Alexa 488-conjugated donkey anti-mouse secondary antibody, Alexa 568-conjugated donkey anti-rabbit antibody, or Alexa 488-conjugated donkey anti-rabbit secondary antibody (all from Life Technologies) were used to visualize primary antibodies accordingly. To reduce autofluorescence, heart sections were treated with 10 mM CuSO4 in 50 mM ammonium acetate for 30 min before they were cover-slipped with ProLong Gold anti-fade reagent with DAPI (Life Technologies). For both ICC and IHC, confocal images were collected with a confocal microscope (Nikon Eclipse Tie-A1RSi).

**Non-fluorescent immunohistochemistry**

IHC was performed on 6 micron thick paraffin sections. The sections were washed with PBS, blocked in normal horseserum (Sigma) at a concentration of 10%in PBS for 90 minutes, and then incubated with rabbit anti-GPR39 antibody (ThermoFisher Scientific, Rockford, IL, #PA5-33709) for 2 hours at room temperature.Sections were washed, then incubated for 30 minutes with Vector ImmPRESS™AP anti-rabbit IgG (alkaline phosphatase) Polymer Detection Kit (Vector #MP-5401), then visualized with Vector Blue AP Substrate (Vector SK-5300). For double labeling, the primary antibody was co-incubated with mouse anti-αSMA monoclonal antibody (Sigma #A2547). The sections were incubated with Vector ImmPRESS™ HRP Anti-Mouse IgG (Peroxidase) Polymer Detection Kit (Vector, #MP-7402), then visualized with Vector DAB Substrate (Vector #SK-4100). This was followed by the anti-rabbit IgG AP and Vector Blue as above. For GPR-39 immunohistochemistry combined with lectin staining, sections were first blocked with normal horse serum, then incubated in Carbo-Free™ Blocking Solution (Vector Laboratories, Burlingame, CA, #SP-5040), 50 minutes at room temperature. Sections were incubated with the primary anti-GPR39 antibody combined with biotinylated *Griffonia (Bandeiraea) Simplicifolia* Lectin I (Vector, #B-1215) for 2 hr at room temperature at a concentration of 1:500 in PBS + 0.05% Tween™ 20 (PBST). After washing, sections were incubated in Vectastain® Elite ABC (peroxidase) reagents (Vector PK-6100) and visualized with DAB. This was followed by anti-rabbit IgG (alkaline phosphatase) and Vector Blue.

**Calcium Imaging of mVSMCs**

Cultured mVSMCs were incubated for 30 min at 37oC in darkness with a solution of HBSS (Life Technologies) containing Fluo-4 AM (2 μM, Life Technologies). After washing with HBSS, cells were used for Ca2+ imaging with confocal microscope (Nikon Eclipse Tie-A1RSi). Fluo-4 was excited by 488 nm line of an Argon laser and emission signals with 500-550 nm were collected. The brightness of the fluorescent signals represents the relative level of intracellular [Ca2+]i. For recording Ca2+ transients, a time scan mode was normally utilized. Digital image processing was performed by using NIS-Element (Nikon). The change of global Ca2+ level after stimulation was reported as % change from baseline (Fpeak/Fbase x 100).

**Lentivirus Mediated RNA Interference**

mVSMCs, at 80% confluence, were infected with lentivirus (10 particles of virus/cell) carrying either shRNAs targeting GPR39 (5′-ATATGTCCATCTGCACGAA-3′) or a control virus carrying the scrambled shRNA purchased from GE Dharmacon. Knockdown of GPR39 was confirmed by quantitative real-time polymerase chain reaction (qRT-PCR) and Western blot.

**Generation of GPR39 knockout mice**

The GPR39 mutant mice were generated by Cyagen Biosciences (Santa Clara, CA) using a CRISPR/Cas9 deletion strategy and zygotic injections (**Fig S8A**). Briefly, two guide RNAs (GTGGGCAACAGCGTCACCATC and GCATGGGTATCGAGTACCCTC) were designed to delete a portion of exon 1 in the mouse GPR39 gene that includes multiple transmembrane domain, rendering the gene non-functional. Genotyping of founders and progeny was conducted using a primer pair (P1-CCGAAAAACTAAGTCACTCCTGGC and P2-CCCTGCTTGCTCTTCATTAGCACTT (**Fig S8B**) producing a 911bp band from the wild-type allele and a 524bp band from the null allele (**Fig S8C**). Heterozygous breeder pairs were mated to generate the GPR39 knockout, heterozygous and wild-type control animals used for this study. Mice lacking both GPR39 alleles did not exhibit any overt phenotypes including altered viability.

**Langendorff Mouse Heart Coronary Perfusion**

GPR39 KO mice and their wild-type littermates were injected with ketamine (100 mg/kg IP), and hearts were immediately excised and perfused retrogradely at a constant flow with Hank’s buffered salt solution(HBSS) of the following composition (mM): 137 NaCl, 5.3 KCl, 1.26 CaCl2, 0.4 MgSO4, 0.49 MgCl2, 4.1 NaHCO3, 0.44 KH2PO4, 0.33 Na2HPO4, 5.5 D-glucose. The perfusion solution was oxygenated by bubbling carbogen (95% O2, 5% CO2) through the solution. The pH was set to 7.4, and temperature was kept at 37 °C using Hugo Sachs Elektronik Langendorff Perfusion System (Harvard Apparatus). The hearts were equilibrated for at least 1 hour before drug treatments (200 nM of 14,15-EET or 15-HETE in the presence of 10 uM zinc, which had no effect on by itself; 200 nM prostaglandin I2; 100 nM angiotensin II; 1:10,000 ethanol as vehicle). The coronary perfusion pressure (CPP) was recorded with Pressure Monitor PM-4 (Living System Instrumentation). The signals were digitized with AxonCNS Digidata 440A and analyzed with the AxoScope 10.7 (Molecular Devices).

**In-Vivo Myocardial Ischemia / Reperfusion in the Mouse**

Under isoflurane anesthesia (3% induction, 1.5% maintenance), ECG electrodes were placed subcutaneously on both forelimbs and the right hind limb. The skin was incised between the left third and fourth ribs, and the external oblique muscle separated from the pectoralis muscle and retracted gently. The thorax was opened by making a small hole in the 4th intercostal space, enlarged by cutting the intercostal muscles and retracted gently to allow access to the heart. The pericardium was cut and the left coronary artery identified. An 8-0 ligature was placed around the artery, a small segment of PE-10 tubing was threaded though the ligature suture and held in place with a clamp to occlude the artery. After 45 min, the PE tubing was gently removed to reperfuse the heart for 2 hr. To quantify infarct size, the left coronary artery was briefly re-occluded and Evans Blue infused i.v. to define the area at risk (AAR). The heart was then immediately excised, frozen for 10 min, sliced along the long axis, and stained with triphenyltetrazolium chloride (TTC; 1% in PBS) for 20 min at 37 °C, followed by incubation in 10 % neutral buffered formalin overnight. Heart sections were then imaged using a digital camera to quantify infarct size as the area of tissue lacking TTC staining normalized to the AAR.

**Data Analysis**

Data analysis was performed using Prism 6.0 statistical software package (GraphPad, San Diego, CA). Sample size (n) represents independent measurements taken from distinct samples. For normally distributed samples, group differences were assessed by a two-tailed t-test or ANOVA with a Student-Newman-Keuls post hoc test. Statistical significance was assumed for *p* values < 0.05. The results are expressed as means ± SEM.

**Data availability statement**: Complete MS data has been deposited to the ProteomeXchange Consortium via the PRIDE database (dataset identifier PXD013952). The data that support other findings of this study are available from the corresponding author upon reasonable request.

**
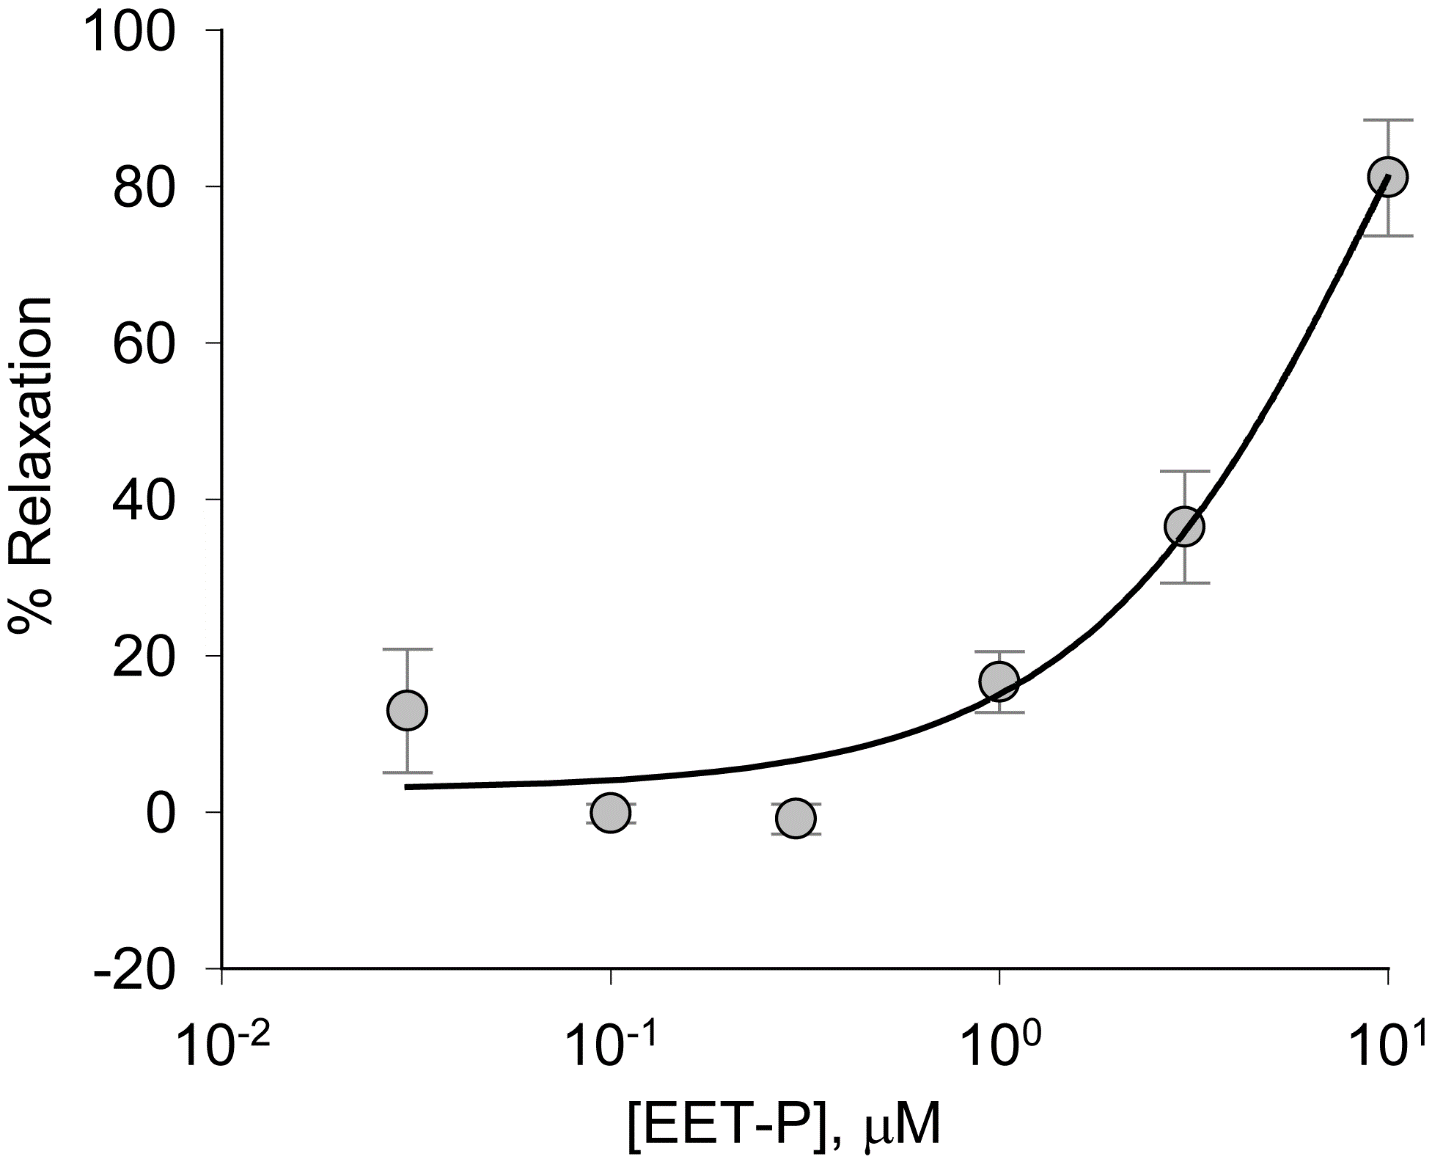
**

**Fig S1.** Characterization of the vasorelaxant effect of EET-P. Arteries were pre-constricted by superfusion with thromboxane A2 receptor agonist U-46619 (20-40 nM), then exposed to incremental concentrations of 14,15 EET-P.


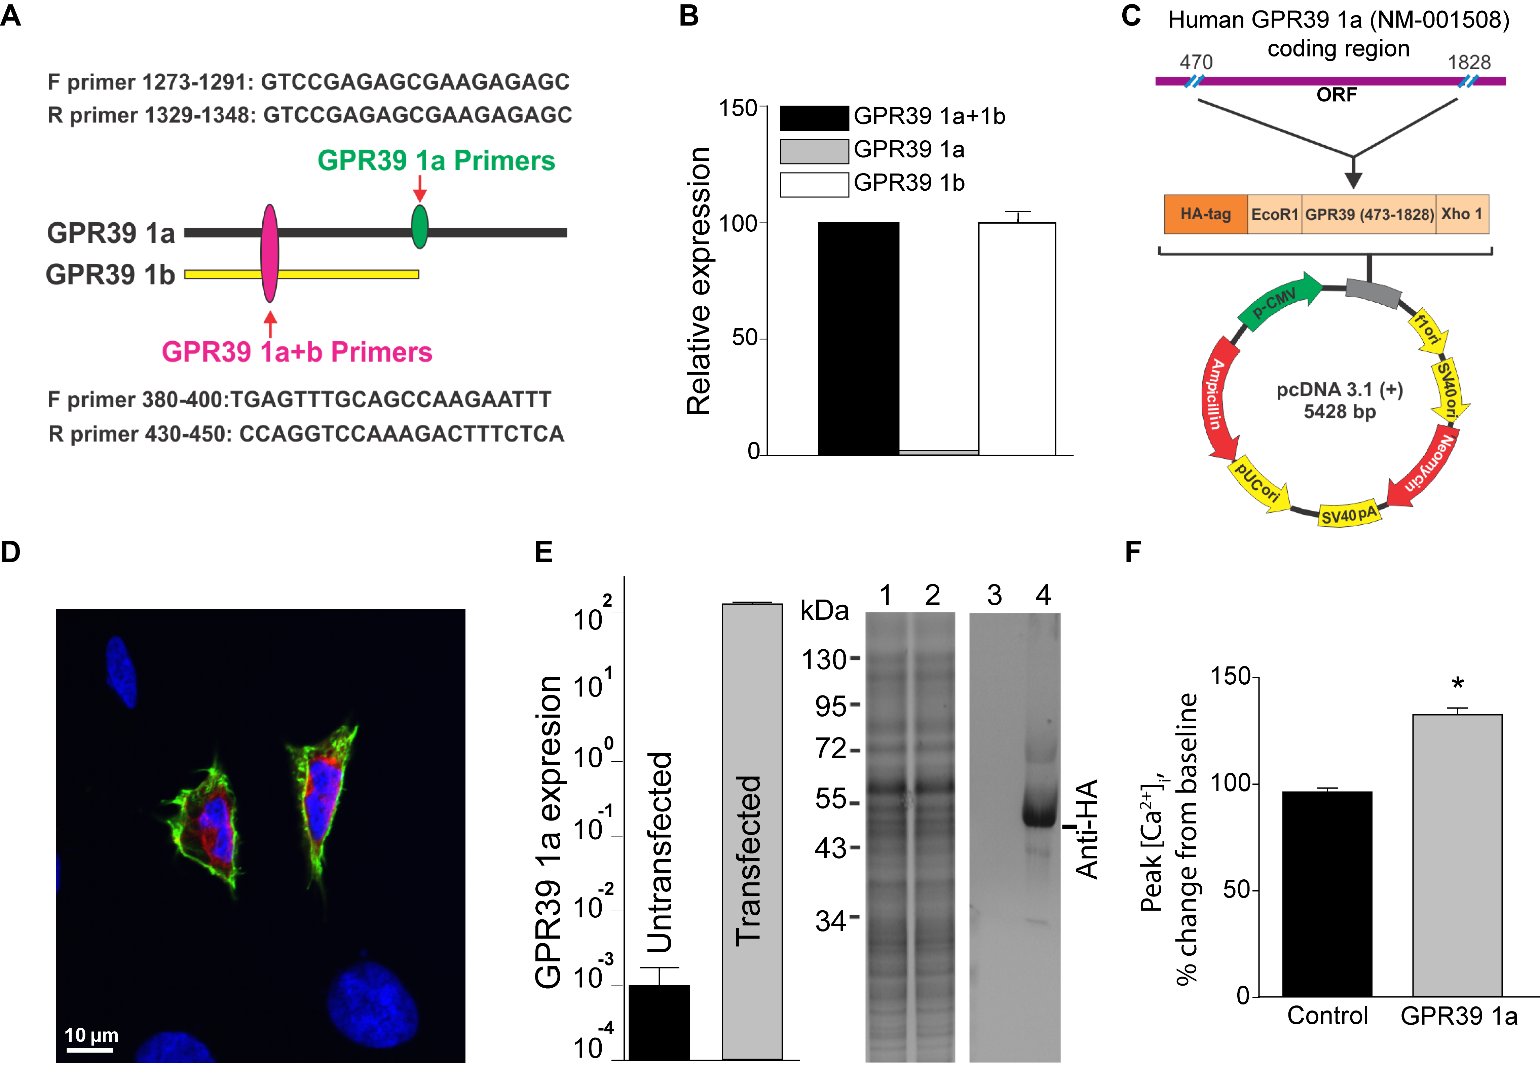


Fig. S2. Characterization of GPR39 1a expression in naïve and stably-expressing HEK293 cells. (A) Diagram depicting the sequence and location of the quantitative PCR primers used to distinguish GPR39 1a and 1b. (B) qPCR analysis of GPR39 isoform expression in naïve HEK293 cells. (C) Diagram of the expression vector used to create HEK293 cells stably expressing GPR39 1a. (D) Fluorescent labeling of transiently-expressed HA-tagged GPR39 in HEK-293 cells detected using a FITC-conjugated anti-HA antibody before (green) and after membrane permeabilization using Alexa Fluor 555-conjugated anti-HA (red). DNA is labled using DAPI (blue). (E) Expression of GPR39 1a confirmed by RT-PCR (left) and Western blot (right, lane 4; lane 3 untransfected). Coomassie blue staining gel used as a loading control (right, lanes 1 and 2). (F) Calcium imaging demonstrating an increase in [Ca2+]i by 15-HETE (50 nM+4 µM zinc) in GPR39 1a-transfected, but not untransfected HEK cells.


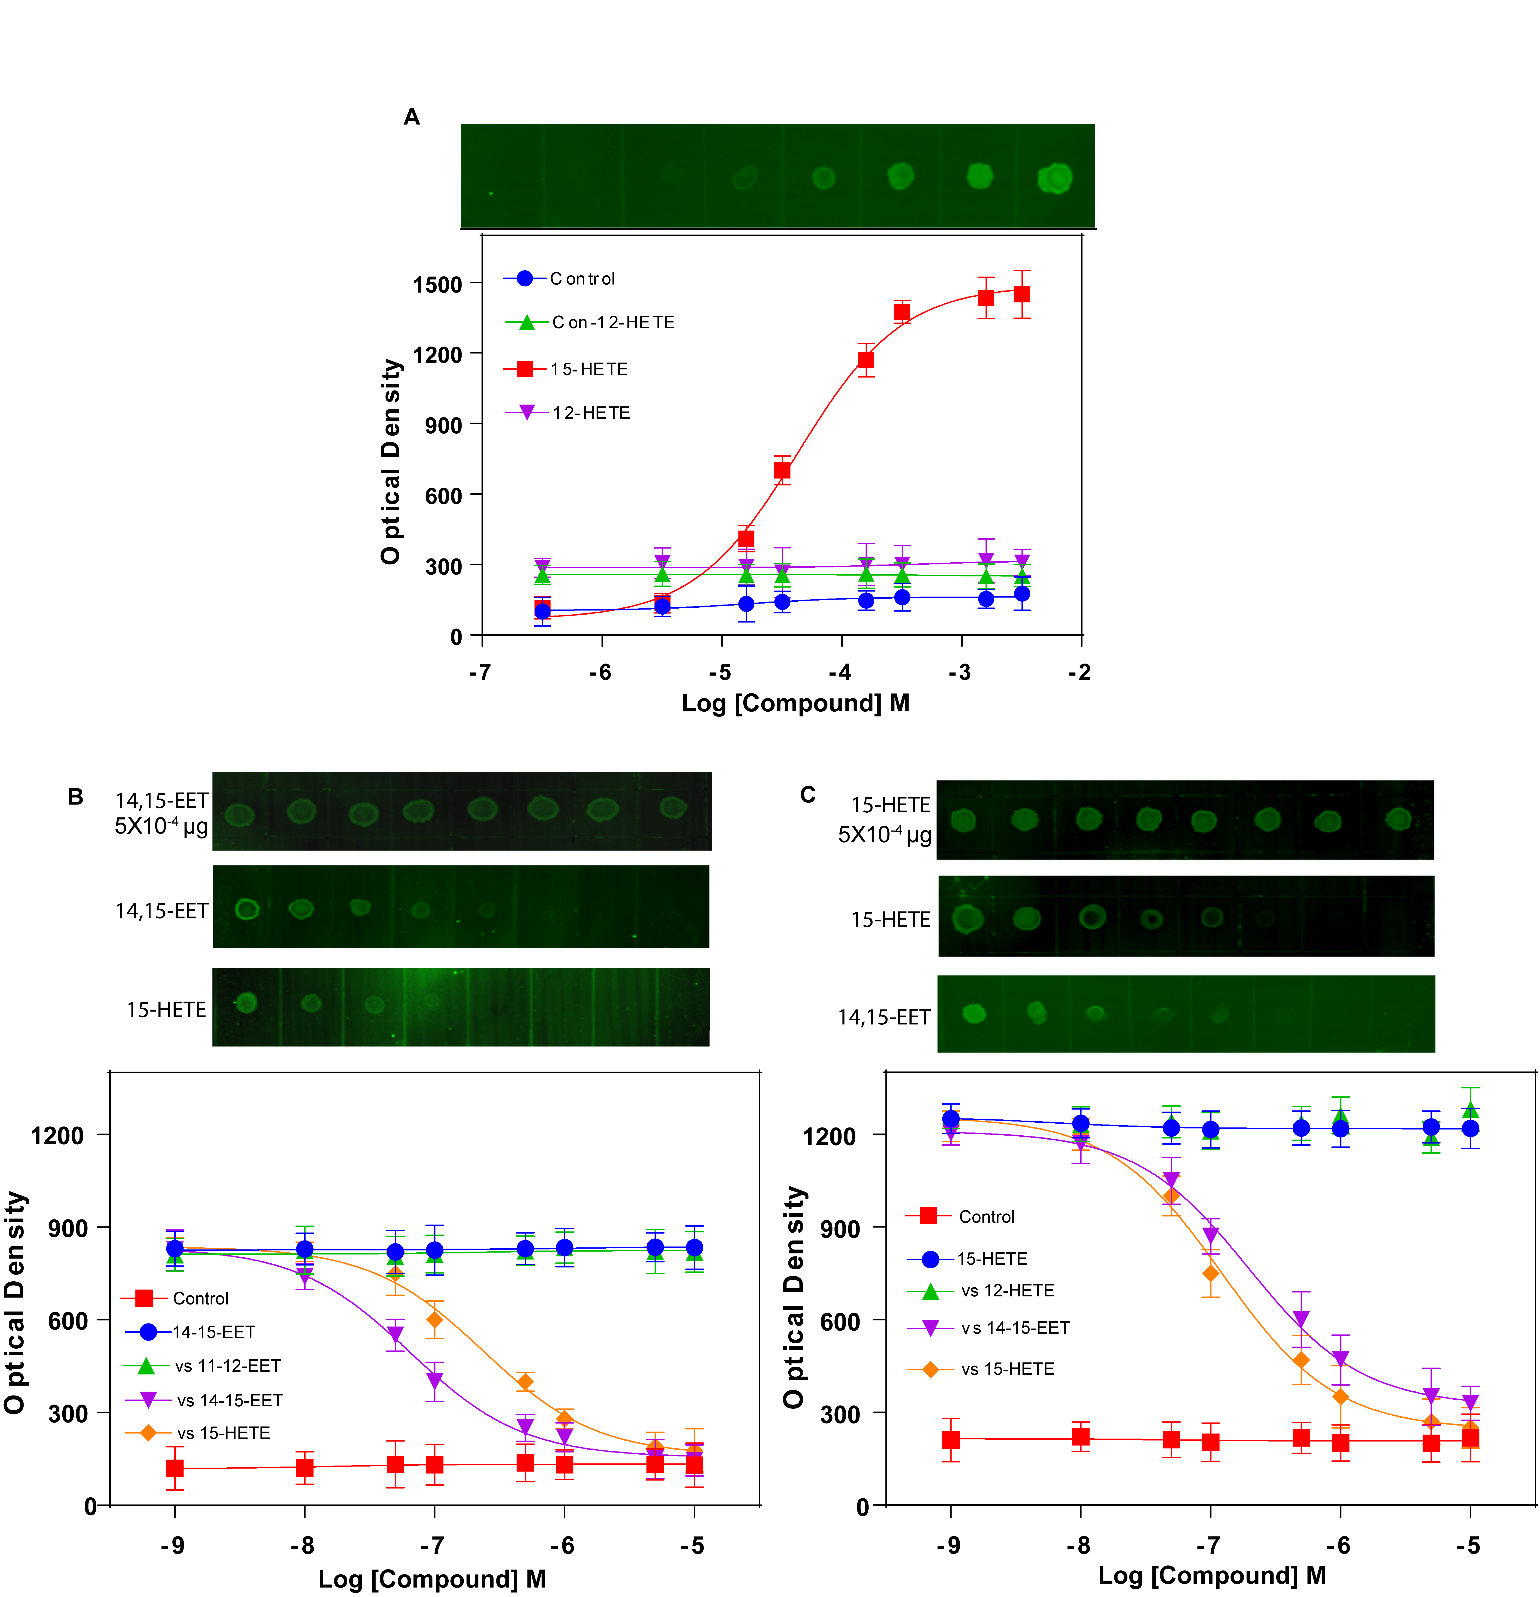


**Fig. S3.** Dot-blot assay analysis of eicosanoid-binding specificity and competition. (A) Comparison of 12-HETE and 15-HETE binding by membrane fraction lysates from control and GPR39 1a stably-expressing HEK293 cells. (B) Binding competition experiment indicating binding saturation of membrane fraction from GPR39 1a expressing, but not control HEK293 cells, to immobilized 14,15-EET, and displacement by 14,15-EET or 15-HETE, but not by 11,12-EET. (C) Dot-blot competition experiment demonstrating a similar saturation effect of membrane fraction from GPR39 1a expressing, but not control HEK293 cells, to immobilized 15-HETE, and displacement by 15-HETE or 14,15-EET, but not by 12-HETE.

**
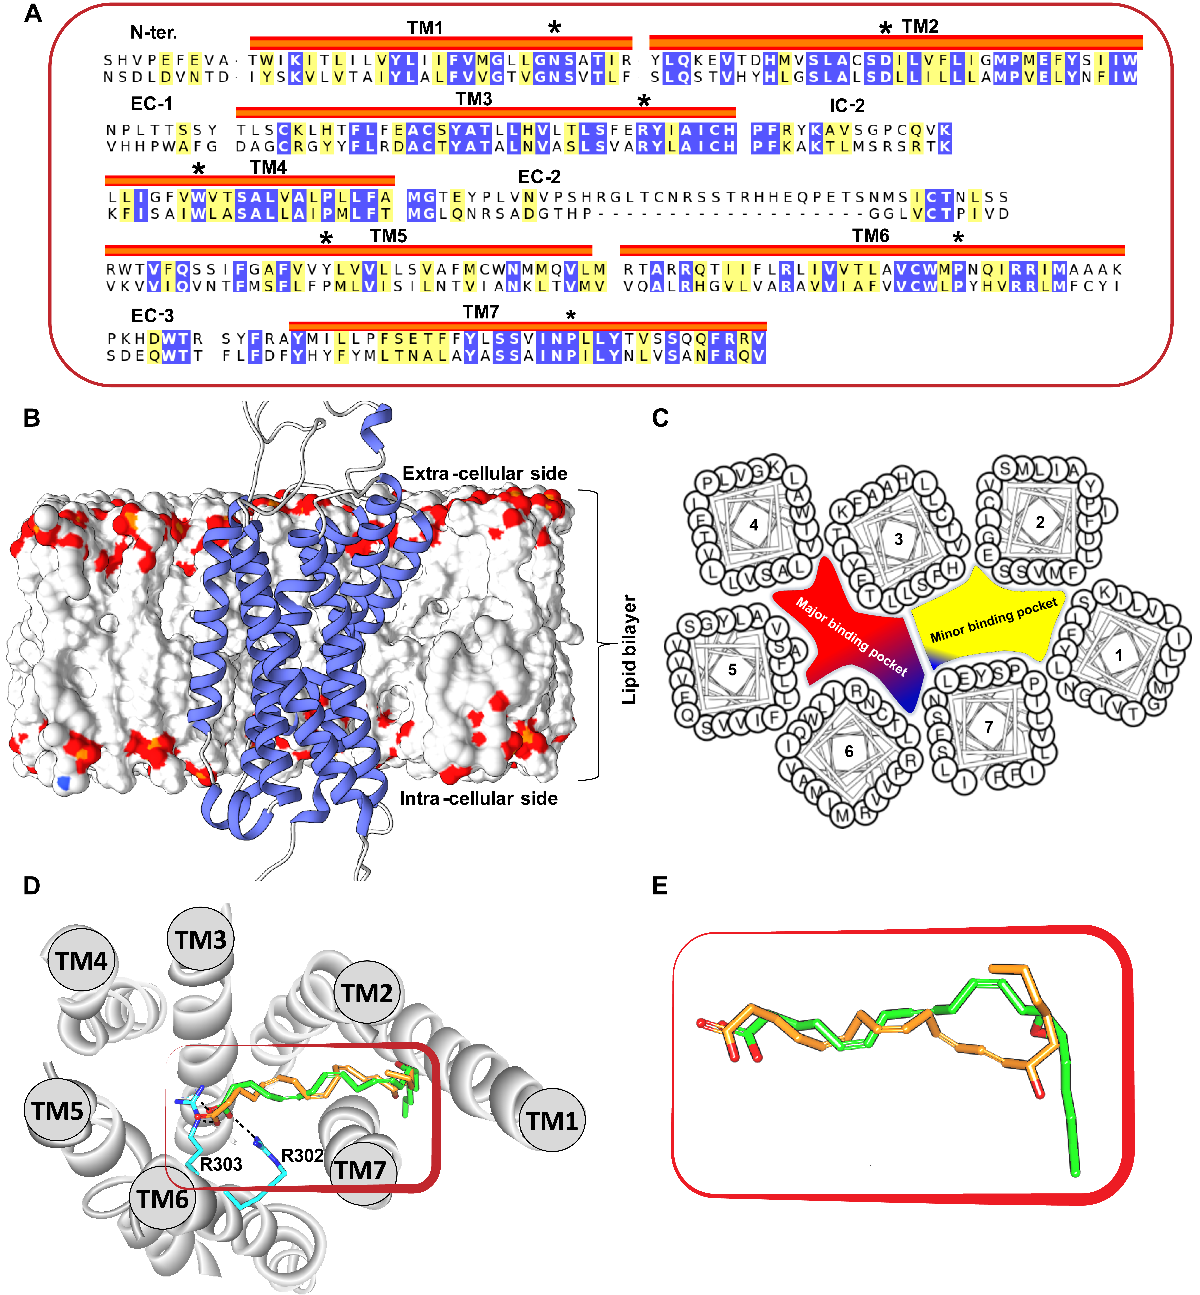
**

**Fig. S4.** Molecular modeling of GPR39 1a to characterize the eicosanoid binding pocket. (A) Sequence alignment between target (GPR39) and template (neurotensin receptor 1; 4GRV) used for generating homology model. Blue shades highlight identical residues, yellow shades highlight similar residues. Asterisks indicate conserved residues in the trans-membrane region. Conserved proline residue at TM5 is replaced by tyrosine in GPR39. (B) Visualization of the predicted structure of GPR39 1a in a lipid bilayer based on molecular modeling. (C) Map of the major and minor binding pockets formed by the transmembrane domains of GPR39 1a. (D) Localization of 14,15-EET (green) and 15-HETE (gold) relative to the transmembrane domains of GPR39 1a, indicating the carboxylate moieties interacting with arginine residues from TM6 and the lipid tail portion extend to minor binding pocket (E) Superimposition of 14,15-EET (green) and 15-HETE (gold) orientation in the putative GPR39 1a binding pocket.


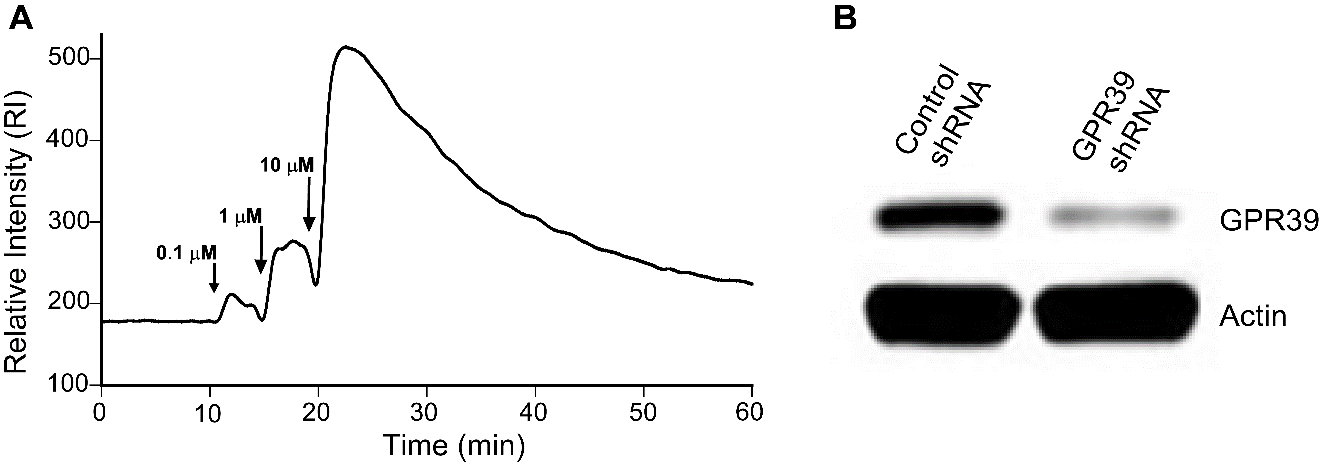


**Fig. S5.** Dose-dependent calcium response to 15-HETE and shRNA knockdown of GPR39 in mVSMCs. (A) Calcium imaging of primary mouse heart mVSMCs; 15-HETE (0.1, 1, 10 µM) increases [Ca2+]i in mVSMCs. (B) Western blot confirmation of GPR39 knockdown in mVSMCs infected with a lentivirus containing a scrambled shRNA (control) or shRNA targeting GPR39.


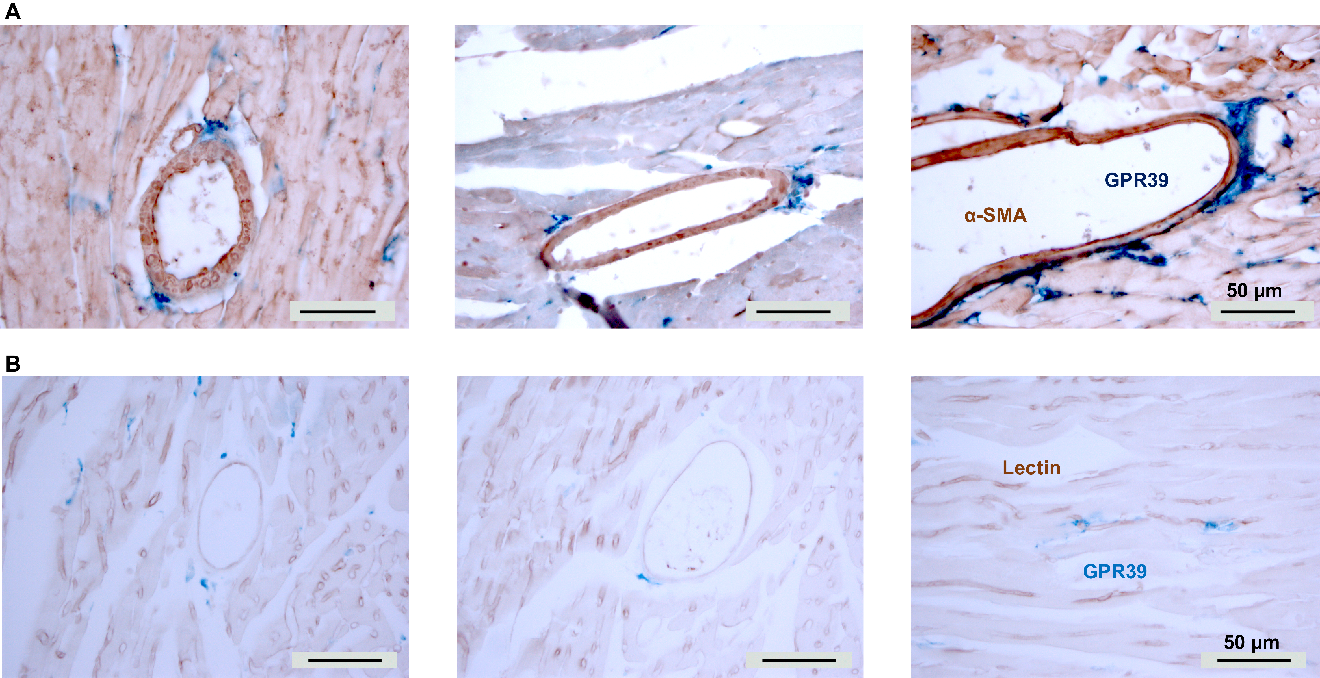


**Fig. S6.** Non-fluorescent immunohistochemical staining of GPR39 in mouse heart. A. Double immunostaining for GPR39 (blue) and α-smooth muscle actin (α-SMA, brown). B. Double staining for GPR39 (blue) and *Griffonia (Bandeiraea) Simplicifolia* Lectin I (brown). Scale bar: 50 microns.

**
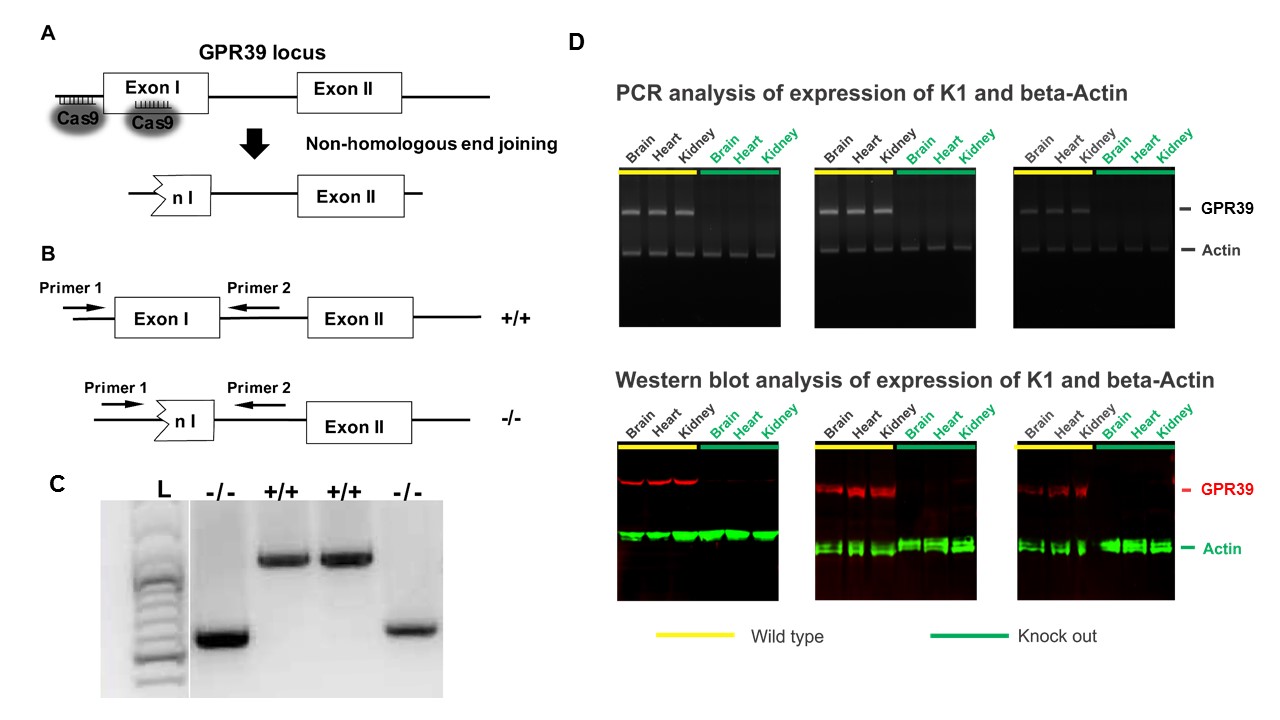
**

**Fig. S7.** CRISPR/Cas9-mediated disruption of the GPR39 locus. (A) Schematic depicting the strategy employed to delete the majority of the exon 1 coding sequence of GPR39. (B) Diagram of the position for the genotyping primers to detect both the mutant and wild type alleles of GPR39. (C) Representative results of genotyping indicating the presence of either the deleted or wild type PCR product. (D) RT-PCR and Western blot analysis of GPR39 1a expression in brain, heart and kidney from wild-type and GPR39 knockout mouse littermates.

**Table S1.** List of proteinspulled down by 14,15-EET photoaffinity probe.

| **Gene Symbol** | **Primary Protein Name** | **Coverage** | **Counts** | **Accession** |
| --- | --- | --- | --- | --- |
| Ephx1 | Epoxide hydrolase 1 | 79.3 | 278 | Q9D379 |
| Pcca | Propionyl-CoA carboxylase alpha chain, mitochondrial (PCCase subunit alpha) | 60.2 | 237 | Q91ZA3 |
| Actb group | Actin, cytoplasmic 1, N-terminally processed | 66.4 | 188 | P60710 |
| Actc1 family | Actin, alpha cardiac muscle 1, intermediate form | 52.5 | 135 | P68033 |
| Ilvbl | Acetolactate synthase-like protein | 49.8 | 130 | Q8BU33 |
| Pcx | Pyruvate carboxylase, mitochondrial | 36.2 | 124 | Q05920 |
| Mccc1 | Methylcrotonoyl-CoA carboxylase subunit alpha, mitochondrial (MCCase subunit alpha) | 55.2 | 122 | Q99MR8 |
| Anxa1 | Annexin A1 | 64.7 | 114 | P10107 |
| Fn1 | Anastellin (FN) | 28.2 | 105 | P11276 |
| Tubb5 family | Tubulin beta-5 chain | 54.5 | 96 | P99024 |
| Hist1h4a | Histone H4 | 52.4 | 94 | P62806 |
| Tubb4b family | Tubulin beta-4B chain | 50.6 | 78 | P68372 |
| Myh9 | Myosin-9 | 27.0 | 76 | Q8VDD5 |
| Vcl | Vinculin | 36.8 | 71 | Q64727 |
| Gapdh | Glyceraldehyde-3-phosphate dehydrogenase (GAPDH) | 43.8 | 70 | P16858 |
| Anxa2 | Annexin A2 | 49.6 | 69 | P07356 |
| Tuba1b | Detyrosinated tubulin alpha-1B chain | 46.6 | 68 | P05213 |
| Actbl2 | Beta-actin-like protein 2 | 22.1 | 66 | Q8BFZ3 |
| Ugt1a7c | UDP-glucuronosyltransferase 1-7C (UDPGT 1-7C; UGT1*7C; UGT1-07C; UGT1.7C) | 46.3 | 62 | Q6ZQM8 |
| Hspa8 | Heat shock cognate 71 kDa protein | 33.9 | 59 | P63017 |
| Pkm | Pyruvate kinase PKM | 55.0 | 56 | P52480 |
| Hsp90ab1 | Heat shock protein HSP 90-beta | 33.4 | 56 | P11499 |
| Asna1 | ATPase Asna1 | 38.2 | 55 | O54984 |
| Actn4 | Alpha-actinin-4 | 32.9 | 55 | P57780 |
| Eef1g | Elongation factor 1-gamma (EF-1-gamma) | 36.8 | 53 | Q9D8N0 |
| Vdac2 | Voltage-dependent anion-selective channel protein 2 (VDAC-2; mVDAC2) | 52.5 | 52 | Q60930 |
| Eef1a1 | Elongation factor 1-alpha 1 (EF-1-alpha-1) | 27.5 | 52 | P10126 |
| Serpinh1 | Serpin H1 | 48.2 | 50 | P19324 |
| Hsd17b12 | Very-long-chain 3-oxoacyl-CoA reductase | 43.3 | 48 | O70503 |
| Atp5a1 | ATP synthase subunit alpha, mitochondrial | 40.9 | 48 | Q03265 |
| Hnrnpa2b1 | Heterogeneous nuclear ribonucleoproteins A2/B1 (hnRNP A2/B1) | 37.1 | 47 | O88569 |
| Vim | Vimentin | 42.3 | 46 | P20152 |
| Actn1 | Alpha-actinin-1 | 34.2 | 46 | Q7TPR4 |
| Hsp90aa1 | Heat shock protein HSP 90-alpha | 27.3 | 44 | P07901 |
| Acaca | Biotin carboxylase | 17.0 | 42 | Q5SWU9 |
| P4hb | Protein disulfide-isomerase (PDI) | 35.4 | 41 | P09103 |
| Ppia | Peptidyl-prolyl cis-trans isomerase A, N-terminally processed | 55.5 | 39 | P17742 |
| Ifitm3 | Interferon-induced transmembrane protein 3 | 32.8 | 39 | Q9CQW9 |
| Mtch2 | Mitochondrial carrier homolog 2 | 25.4 | 38 | Q791V5 |
| Mdh2 | Malate dehydrogenase, mitochondrial | 49.1 | 37 | P08249 |
| Atp2a2 | Sarcoplasmic/endoplasmic reticulum calcium ATPase 2 (SERCA2; SR Ca(2+)-ATPase 2) | 20.5 | 37 | O55143 |
| Hspa5 | Endoplasmic reticulum chaperone BiP | 29.9 | 36 | P20029 |
| Atp1a1 | Sodium/potassium-transporting ATPase subunit alpha-1 (Na(+)/K(+) ATPase alpha-1 subunit) | 23.4 | 36 | Q8VDN2 |
| Vdac1 | Voltage-dependent anion-selective channel protein 1 (VDAC-1; mVDAC1) | 53.7 | 35 | Q60932 |
| Tagln2 | Transgelin-2 | 60.3 | 32 | Q9WVA4 |
| Ywhae | 14-3-3 protein epsilon (14-3-3E) | 46.3 | 31 | P62259 |
| Ptgis | Prostacyclin synthase | 37.9 | 31 | O35074 |
| Hist2h2be family | Histone H2B type 2-E | 33.3 | 31 | Q64524 |
| Slc25a3 | Phosphate carrier protein, mitochondrial | 26.9 | 31 | Q8VEM8 |
| Hspa1b group | Heat shock 70 kDa protein 1B | 20.6 | 31 | P17879 |
| Lgals1 | Galectin-1 (Gal-1) | 46.7 | 29 | P16045 |
| Gstm1 | Glutathione S-transferase Mu 1 | 42.2 | 29 | P10649 |
| Slc25a5 | ADP/ATP translocase 2, N-terminally processed | 33.9 | 29 | P51881 |
| Hsp90b1 | Endoplasmin | 19.5 | 29 | P08113 |
| Rps3 | 40S ribosomal protein S3 | 50.6 | 28 | P62908 |
| Tpi1 | Triosephosphate isomerase (TIM) | 46.5 | 28 | P17751 |
| Slc25a4 | ADP/ATP translocase 1 | 35.9 | 28 | P48962 |
| Mgst1 | Microsomal glutathione S-transferase 1 (Microsomal GST-1) | 26.5 | 28 | Q91VS7 |
| Atp5b | ATP synthase subunit beta, mitochondrial | 28.0 | 27 | P56480 |
| Cltc | Clathrin heavy chain 1 | 14.2 | 27 | Q68FD5 |
| Flna | Filamin-A (FLN-A) | 12.2 | 27 | Q8BTM8 |
| Gstm2 | Glutathione S-transferase Mu 2 | 42.7 | 26 | P15626 |
| Rpl4 | 60S ribosomal protein L4 | 32.9 | 26 | Q9D8E6 |
| Pgk1 | Phosphoglycerate kinase 1 | 31.2 | 26 | P09411 |
| Hspd1 | 60 kDa heat shock protein, mitochondrial | 23.9 | 26 | P63038 |
| Vat1 | Synaptic vesicle membrane protein VAT-1 homolog | 29.1 | 25 | Q62465 |
| Ckap4 | Cytoskeleton-associated protein 4 | 28.7 | 25 | Q8BMK4 |
| Abhd12 | Monoacylglycerol lipase ABHD12 | 26.4 | 25 | Q99LR1 |
| Hspa1l | Heat shock 70 kDa protein 1-like (Heat shock 70 kDa protein 1L) | 20.4 | 25 | P16627 |
| Sptan1 | Spectrin alpha chain, non-erythrocytic 1 | 11.4 | 24 | P16546 |
| Myadm | Myeloid-associated differentiation marker | 8.4 | 24 | O35682 |
| Nsdhl | Sterol-4-alpha-carboxylate 3-dehydrogenase, decarboxylating | 33.1 | 23 | Q9R1J0 |
| Vcp | Transitional endoplasmic reticulum ATPase (TER ATPase) | 20.3 | 23 | Q01853 |
| Fbn1 | Asprosin | 9.5 | 23 | Q61554 |
| Arf3 family | ADP-ribosylation factor 3 | 50.3 | 22 | P61205 |
| Ywhaz | 14-3-3 protein zeta/delta | 35.5 | 22 | P63101 |
| Cct3 | T-complex protein 1 subunit gamma (TCP-1-gamma) | 27.9 | 22 | P80318 |
| Eef2 | Elongation factor 2 (EF-2) | 18.8 | 21 | P58252 |
| Gstp1 | Glutathione S-transferase P 1 (Gst P1) | 33.3 | 20 | P19157 |
| Eno1 | Alpha-enolase | 23.0 | 20 | P17182 |
| Fbln2 | Fibulin-2 (FIBL-2) | 15.9 | 20 | P37889 |
| Atp1a3 group | Sodium/potassium-transporting ATPase subunit alpha-3 (Na(+)/K(+) ATPase alpha-3 subunit) | 10.4 | 20 | Q6PIC6 |
| Pfn1 | Profilin-1 | 57.9 | 19 | P62962 |
| Rab7 | Ras-related protein Rab-7a | 52.2 | 19 | P51150 |
| Aldh1a1 | Retinal dehydrogenase 1 (RALDH 1; RalDH1) | 36.3 | 19 | P24549 |
| Vdac3 | Voltage-dependent anion-selective channel protein 3 (VDAC-3; mVDAC3) | 33.9 | 19 | Q60931 |
| Pcbp2 | Poly(rC)-binding protein 2 | 31.2 | 19 | Q61990 |
| Baiap2 | Brain-specific angiogenesis inhibitor 1-associated protein 2 (BAI-associated protein 2; BAI1-associated protein 2) | 26.9 | 19 | Q8BKX1 |
| Lmna | Lamin-A/C | 23.5 | 19 | P48678 |
| Slc25a11 | Mitochondrial 2-oxoglutarate/malate carrier protein (OGCP) | 32.8 | 18 | Q9CR62 |
| Phb | Prohibitin | 32.7 | 18 | P67778 |
| Hist2h2ac family | Histone H2A type 2-C | 30.2 | 18 | Q64523 |
| Aldoa | Fructose-bisphosphate aldolase A | 20.6 | 18 | P05064 |
| Anxa6 | Annexin A6 | 17.4 | 18 | P14824 |
| Got2 | Aspartate aminotransferase, mitochondrial (mAspAT) | 13.7 | 17 | P05202 |
| Rrbp1 | Ribosome-binding protein 1 | 10.8 | 17 | Q99PL5 |
| Arhgdia | Rho GDP-dissociation inhibitor 1 (Rho GDI 1) | 30.4 | 16 | Q99PT1 |
| Ifit1 | Interferon-induced protein with tetratricopeptide repeats 1 (IFIT-1) | 22.0 | 16 | Q64282 |
| Myh10 | Myosin-10 | 9.6 | 16 | Q61879 |
| Rps8 | 40S ribosomal protein S8 | 32.2 | 15 | P62242 |
| Otub1 | Ubiquitin thioesterase OTUB1 | 26.6 | 15 | Q7TQI3 |
| Pcbp1 | Poly(rC)-binding protein 1 | 25.3 | 15 | P60335 |
| Pdia3 | Protein disulfide-isomerase A3 | 22.8 | 15 | P27773 |
| Tpm1 | Tropomyosin alpha-1 chain | 20.1 | 15 | P58771 |
| Hspa4 | Heat shock 70 kDa protein 4 | 15.8 | 15 | Q61316 |
| E9Q616_MOUSE | na | 9.5 | 15 | E9Q616 |
| Hmox2 | Heme oxygenase 2 (HO-2) | 40.6 | 14 | O70252 |
| Atp5o | ATP synthase subunit O, mitochondrial | 36.6 | 14 | Q9DB20 |
| Rab1 | Ras-related protein Rab-1A | 36.1 | 14 | P62821 |
| Rplp0 | 60S acidic ribosomal protein P0 | 32.5 | 14 | P14869 |
| Etfa | Electron transfer flavoprotein subunit alpha, mitochondrial (Alpha-ETF) | 32.4 | 14 | Q99LC5 |
| Cyb5r3 | NADH-cytochrome b5 reductase 3 soluble form | 31.2 | 14 | Q9DCN2 |
| Rpsa | 40S ribosomal protein SA | 25.4 | 14 | P14206 |
| mt-Co2 | Cytochrome c oxidase subunit 2 | 20.3 | 14 | P00405 |
| Hadha | Long chain 3-hydroxyacyl-CoA dehydrogenase | 14.8 | 14 | Q8BMS1 |
| Rpl19 | 60S ribosomal protein L19 | 13.8 | 14 | P84099 |
| Rab1b | Ras-related protein Rab-1B | 39.3 | 13 | Q9D1G1 |
| Myl6 | Myosin light polypeptide 6 | 34.4 | 13 | Q60605 |
| Rab2a | Ras-related protein Rab-2A | 30.7 | 13 | P53994 |
| Rack1 | Receptor of activated protein C kinase 1, N-terminally processed | 24.0 | 13 | P68040 |
| Slc25a20 | Mitochondrial carnitine/acylcarnitine carrier protein | 23.3 | 13 | Q9Z2Z6 |
| Eif4a2 | Eukaryotic initiation factor 4A-II (eIF-4A-II; eIF4A-II) | 22.9 | 13 | P10630 |
| Pon3 | Serum paraoxonase/lactonase 3 | 21.5 | 13 | Q62087 |
| Rpl18 | 60S ribosomal protein L18 | 19.7 | 13 | P35980 |
| D3Z2H9_MOUSE | na | 18.1 | 13 | D3Z2H9 |
| Hnrnpm | Heterogeneous nuclear ribonucleoprotein M (hnRNP M) | 17.0 | 13 | Q9D0E1 |
| V9GX06_MOUSE | na | 14.2 | 13 | V9GX06 |
| Rpl11 | 60S ribosomal protein L11 | 12.9 | 13 | Q9CXW4 |
| Tkt | Transketolase (TK) | 12.4 | 13 | P40142 |
| Hnrnpu | Heterogeneous nuclear ribonucleoprotein U (hnRNP U) | 9.5 | 13 | Q8VEK3 |
| Cox5a | Cytochrome c oxidase subunit 5A, mitochondrial | 48.6 | 12 | P12787 |
| Napa | Alpha-soluble NSF attachment protein (SNAP-alpha) | 39.3 | 12 | Q9DB05 |
| Lrrc59 | Leucine-rich repeat-containing protein 59, N-terminally processed | 23.1 | 12 | Q922Q8 |
| Ldha | L-lactate dehydrogenase A chain (LDH-A) | 20.2 | 12 | P06151 |
| Tpm3 | Tropomyosin alpha-3 chain | 15.1 | 12 | P21107 |
| Scarb2 | Lysosome membrane protein 2 | 14.6 | 12 | O35114 |
| Tm9sf3 | Transmembrane 9 superfamily member 3 | 12.8 | 12 | Q9ET30 |
| Trap1 | Heat shock protein 75 kDa, mitochondrial (HSP 75) | 12.0 | 12 | Q9CQN1 |
| Pfkl | ATP-dependent 6-phosphofructokinase, liver type (ATP-PFK; PFK-L) | 11.0 | 12 | P12382 |
| Flnb | Filamin-B (FLN-B) | 6.1 | 12 | Q80X90 |
| Prdx5 | Peroxiredoxin-5, mitochondrial | 37.1 | 11 | P99029 |
| Dcakd | Dephospho-CoA kinase domain-containing protein | 26.0 | 11 | Q8BHC4 |
| H2afz group | Histone H2A.Z (H2A/z) | 25.8 | 11 | P0C0S6 |
| Rpl3 | 60S ribosomal protein L3 | 24.8 | 11 | P27659 |
| Rpl13 | 60S ribosomal protein L13 | 24.2 | 11 | P47963 |
| Acadvl | Very long-chain specific acyl-CoA dehydrogenase, mitochondrial | 19.5 | 11 | P50544 |
| Wdr1 | WD repeat-containing protein 1 | 16.7 | 11 | O88342 |
| Cct8 | T-complex protein 1 subunit theta (TCP-1-theta) | 16.6 | 11 | P42932 |
| Hnrnpk | Heterogeneous nuclear ribonucleoprotein K (hnRNP K) | 15.3 | 11 | P61979 |
| Pabpc1 | Polyadenylate-binding protein 1 (PABP-1; Poly(A)-binding protein 1) | 13.8 | 11 | P29341 |
| Acbd3 | Golgi resident protein GCP60 | 12.2 | 11 | Q8BMP6 |
| Uba1 | Ubiquitin-like modifier-activating enzyme 1 | 11.2 | 11 | Q02053 |
| Hist1h1e | Histone H1.4 | 10.5 | 11 | P43274 |
| Phgdh | D-3-phosphoglycerate dehydrogenase (3-PGDH) | 9.6 | 11 | Q61753 |
| Apmap | Adipocyte plasma membrane-associated protein | 5.5 | 11 | Q9D7N9 |
| Tmem14c | Transmembrane protein 14C | 50.0 | 10 | Q9CQN6 |
| Rpl12 | 60S ribosomal protein L12 | 45.5 | 10 | P35979 |
| Tagln | Transgelin | 34.8 | 10 | P37804 |
| Ubb group | Ubiquitin | 32.8 | 10 | P0CG49 |
| Ifitm2 | Interferon-induced transmembrane protein 2 | 29.2 | 10 | Q99J93 |
| Sept2 | Septin-2 | 23.3 | 10 | P42208 |
| Ppox | Protoporphyrinogen oxidase (PPO) | 23.1 | 10 | P51175 |
| Ptbp1 | Polypyrimidine tract-binding protein 1 (PTB) | 21.3 | 10 | P17225 |
| Rpn2 | Dolichyl-diphosphooligosaccharide--protein glycosyltransferase subunit 2 | 19.2 | 10 | Q9DBG6 |
| Cyp51 | Lanosterol 14-alpha demethylase (LDM) | 18.7 | 10 | Q8K0C4 |
| Q792Z1_MOUSE | na | 18.7 | 10 | Q792Z1 |
| Cd81 | CD81 antigen | 18.2 | 10 | P35762 |
| Gpi1 | Glucose-6-phosphate isomerase (GPI) | 15.8 | 10 | P06745 |
| Cpt1a | Carnitine O-palmitoyltransferase 1, liver isoform (CPT1-L) | 15.8 | 10 | P97742 |
| Plgrkt | Plasminogen receptor (KT) (Plg-R(KT)) | 15.6 | 10 | Q9D3P8 |
| Maoa | Amine oxidase [flavin-containing] A | 14.6 | 10 | Q64133 |
| Ctsb | Cathepsin B heavy chain | 13.9 | 10 | P10605 |
| Sept11 | Septin-11 | 13.9 | 10 | Q8C1B7 |
| Aldh2 | Aldehyde dehydrogenase, mitochondrial | 13.1 | 10 | P47738 |
| Aco2 | Aconitate hydratase, mitochondrial (Aconitase) | 11.9 | 10 | Q99KI0 |
| Hist1h1c group | Histone H1.2 | 11.3 | 10 | P15864 |
| Rpl7a | 60S ribosomal protein L7a | 9.4 | 10 | P12970 |
| Flnc | Filamin-C (FLN-C) | 5.0 | 10 | Q8VHX6 |
| Myh11 | Myosin-11 | 4.7 | 10 | O08638 |
| Rpl30 | 60S ribosomal protein L30 | 51.3 | 9 | P62889 |
| Eif5a | Eukaryotic translation initiation factor 5A-1 (eIF-5A-1; eIF-5A1) | 45.5 | 9 | P63242 |
| Cfl1 | Cofilin-1 | 40.4 | 9 | P18760 |
| Rps16 | 40S ribosomal protein S16 | 31.5 | 9 | P14131 |
| Anxa3 | Annexin A3 | 31.0 | 9 | O35639 |
| Mtpn | Myotrophin | 30.5 | 9 | P62774 |
| Ppp1cb | Serine/threonine-protein phosphatase PP1-beta catalytic subunit (PP-1B) | 29.7 | 9 | P62141 |
| Hnrnpa1 | Heterogeneous nuclear ribonucleoprotein A1, N-terminally processed | 29.1 | 9 | P49312 |
| Hist1h3b | Histone H3.2 | 28.7 | 9 | P84228 |
| Pcna group | Proliferating cell nuclear antigen (PCNA) | 27.2 | 9 | P17918 |
| Rps4x | 40S ribosomal protein S4, X isoform | 25.1 | 9 | P62702 |
| Npm1 | Nucleophosmin (NPM) | 21.6 | 9 | Q61937 |
| Capzb | F-actin-capping protein subunit beta | 20.9 | 9 | P47757 |
| Tmem43 | Transmembrane protein 43 | 20.5 | 9 | Q9DBS1 |
| Phb2 | Prohibitin-2 | 19.7 | 9 | O35129 |
| Tmem165 | Transmembrane protein 165 | 16.7 | 9 | P52875 |
| Ptgs1 | Prostaglandin G/H synthase 1 | 14.8 | 9 | P22437 |
| Ddx39b | Spliceosome RNA helicase Ddx39b | 14.5 | 9 | Q9Z1N5 |
| Khsrp | Far upstream element-binding protein 2 (FUSE-binding protein 2) | 14.2 | 9 | Q3U0V1 |
| Ahcy | Adenosylhomocysteinase (AdoHcyase) | 13.9 | 9 | P50247 |
| Hnrnpa3 group | Heterogeneous nuclear ribonucleoprotein A3 (hnRNP A3) | 13.7 | 9 | Q8BG05 |
| Rdh11 | Retinol dehydrogenase 11 | 13.6 | 9 | Q9QYF1 |
| Cct4 | T-complex protein 1 subunit delta (TCP-1-delta) | 13.0 | 9 | P80315 |
| Ywhag | 14-3-3 protein gamma, N-terminally processed | 12.1 | 9 | P61982 |
| Ncl | Nucleolin | 11.5 | 9 | P09405 |
| Hnrnpd | Heterogeneous nuclear ribonucleoprotein D0 (hnRNP D0) | 10.4 | 9 | Q60668 |
| Stt3a | Dolichyl-diphosphooligosaccharide--protein glycosyltransferase subunit STT3A (Oligosaccharyl transferase subunit STT3A; STT3-A) | 10.1 | 9 | P46978 |
| Vps35 | Vacuolar protein sorting-associated protein 35 | 9.8 | 9 | Q9EQH3 |
| Tars | Threonine--tRNA ligase, cytoplasmic | 8.6 | 9 | Q9D0R2 |
| Nme1 | Nucleoside diphosphate kinase A (NDK A; NDP kinase A) | 36.8 | 8 | P15532 |
| Nme2 group | Nucleoside diphosphate kinase B (NDK B; NDP kinase B) | 36.8 | 8 | Q01768 |
| Ran | GTP-binding nuclear protein Ran | 34.3 | 8 | P62827 |
| Pcyox1 | Prenylcysteine oxidase | 21.6 | 8 | Q9CQF9 |
| Ywhab | 14-3-3 protein beta/alpha, N-terminally processed | 19.1 | 8 | Q9CQV8 |
| Dhrs1 | Dehydrogenase/reductase SDR family member 1 | 18.5 | 8 | Q99L04 |
| Rab35 | Ras-related protein Rab-35 | 18.4 | 8 | Q6PHN9 |
| Stip1 | Stress-induced-phosphoprotein 1 (STI1; mSTI1) | 16.9 | 8 | Q60864 |
| Sfxn3 | Sideroflexin-3 | 16.8 | 8 | Q91V61 |
| Rpl15 | 60S ribosomal protein L15 | 16.2 | 8 | Q9CZM2 |
| Sept7 | Septin-7 | 14.9 | 8 | O55131 |
| Hspa9 | Stress-70 protein, mitochondrial | 13.8 | 8 | P38647 |
| Rpl7 | 60S ribosomal protein L7 | 13.3 | 8 | P14148 |
| Tpm2 | Tropomyosin beta chain | 12.3 | 8 | P58774 |
| Pls3 | Plastin-3 | 11.9 | 8 | Q99K51 |
| Ppp2r1a | Serine/threonine-protein phosphatase 2A 65 kDa regulatory subunit A alpha isoform | 11.7 | 8 | Q76MZ3 |
| Ddx5 | Probable ATP-dependent RNA helicase DDX5 | 10.3 | 8 | Q61656 |
| Eif3a | Eukaryotic translation initiation factor 3 subunit A (eIF3a) | 5.4 | 8 | P23116 |
| Rtn4 | Reticulon-4 | 5.2 | 8 | Q99P72 |
| Rab5c | Ras-related protein Rab-5C | 33.3 | 7 | P35278 |
| Rpl23 | 60S ribosomal protein L23 | 30.7 | 7 | P62830 |
| Etfb | Electron transfer flavoprotein subunit beta (Beta-ETF) | 25.1 | 7 | Q9DCW4 |
| Rps3a1 | 40S ribosomal protein S3a | 24.6 | 7 | P97351 |
| Rps20 | 40S ribosomal protein S20 | 22.7 | 7 | P60867 |
| Prdx1 | Peroxiredoxin-1 | 19.6 | 7 | P35700 |
| Pnp | Purine nucleoside phosphorylase (PNP) | 18.3 | 7 | P23492 |
| Gnai2 | Guanine nucleotide-binding protein G(i) subunit alpha-2 | 16.3 | 7 | P08752 |
| Mdh1 | Malate dehydrogenase, cytoplasmic | 14.7 | 7 | P14152 |
| Pmpca | Mitochondrial-processing peptidase subunit alpha | 14.7 | 7 | Q9DC61 |
| Ergic1 | Endoplasmic reticulum-Golgi intermediate compartment protein 1 | 14.5 | 7 | Q9DC16 |
| H2afy | Core histone macro-H2A.1 (Histone macroH2A1; mH2A1) | 14.5 | 7 | Q9QZQ8 |
| Acat1 | Acetyl-CoA acetyltransferase, mitochondrial | 14.2 | 7 | Q8QZT1 |
| Hnrnph1 | Heterogeneous nuclear ribonucleoprotein H, N-terminally processed (hnRNP H) | 10.5 | 7 | O35737 |
| Rpl8 | 60S ribosomal protein L8 | 10.5 | 7 | P62918 |
| Shmt2 | Serine hydroxymethyltransferase, mitochondrial (SHMT) | 10.5 | 7 | Q9CZN7 |
| Kpnb1 | Importin subunit beta-1 | 9.0 | 7 | P70168 |
| Hnrnpab | Heterogeneous nuclear ribonucleoprotein A/B (hnRNP A/B) | 8.4 | 7 | Q99020 |
| Zmpste24 | CAAX prenyl protease 1 homolog | 8.2 | 7 | Q80W54 |
| Sfpq | Splicing factor, proline- and glutamine-rich | 8.2 | 7 | Q8VIJ6 |
| Hnrnpl | Heterogeneous nuclear ribonucleoprotein L (hnRNP L) | 7.5 | 7 | Q8R081 |
| Eftud2 | 116 kDa U5 small nuclear ribonucleoprotein component | 7.0 | 7 | O08810 |
| Eif3c | Eukaryotic translation initiation factor 3 subunit C (eIF3c) | 6.4 | 7 | Q8R1B4 |
| Cse1l | Exportin-2 (Exp2) | 6.2 | 7 | Q9ERK4 |
| Atp1a4 | Sodium/potassium-transporting ATPase subunit alpha-4 (Na(+)/K(+) ATPase alpha-4 subunit) | 6.0 | 7 | Q9WV27 |
| Myo1c | Unconventional myosin-Ic | 4.9 | 7 | Q9WTI7 |
| Myh14 | Myosin-14 | 3.5 | 7 | Q6URW6 |
| F8VQ05_MOUSE | na | 0.8 | 7 | F8VQ05 |
| Lsm2 | U6 snRNA-associated Sm-like protein LSm2 | 52.6 | 6 | O35900 |
| Rps17 | 40S ribosomal protein S17 | 40.0 | 6 | P63276 |
| Gng12 | Guanine nucleotide-binding protein G(I)/G(S)/G(O) subunit gamma-12 | 37.5 | 6 | Q9DAS9 |
| Eloc | Elongin-C (EloC) | 30.4 | 6 | P83940 |
| Pgrmc1 | Membrane-associated progesterone receptor component 1 (mPR) | 29.7 | 6 | O55022 |
| Vamp2 | Vesicle-associated membrane protein 2 (VAMP-2) | 28.4 | 6 | P63044 |
| Bcap31 | B-cell receptor-associated protein 31 (BCR-associated protein 31; Bap31) | 27.8 | 6 | Q61335 |
| Hebp1 | Heme-binding protein 1 | 26.3 | 6 | Q9R257 |
| Rpl5 | 60S ribosomal protein L5 | 23.9 | 6 | P47962 |
| Rpl9 group | 60S ribosomal protein L9 | 22.4 | 6 | P51410 |
| Rpl27a | 60S ribosomal protein L27a | 22.3 | 6 | P14115 |
| Cnn3 | Calponin-3 | 22.1 | 6 | Q9DAW9 |
| Srprb group | Signal recognition particle receptor subunit beta (SR-beta) | 21.9 | 6 | P47758 |
| Ppp1ca | Serine/threonine-protein phosphatase PP1-alpha catalytic subunit (PP-1A) | 20.3 | 6 | P62137 |
| Rps9 | 40S ribosomal protein S9 | 19.1 | 6 | Q6ZWN5 |
| Pdia6 | Protein disulfide-isomerase A6 | 19.1 | 6 | Q922R8 |
| Rpl22 | 60S ribosomal protein L22 | 18.8 | 6 | P67984 |
| Paics | Phosphoribosylaminoimidazole carboxylase | 18.4 | 6 | Q9DCL9 |
| Cap1 | Adenylyl cyclase-associated protein 1 (CAP 1) | 18.1 | 6 | P40124 |
| Ywhah | 14-3-3 protein eta | 17.1 | 6 | P68510 |
| Idh1 | Isocitrate dehydrogenase [NADP] cytoplasmic (IDH) | 15.9 | 6 | O88844 |
| Rps14 | 40S ribosomal protein S14 | 15.9 | 6 | P62264 |
| Rpl18a | 60S ribosomal protein L18a | 15.3 | 6 | P62717 |
| Mnda | Interferon-activable protein 205-B (Ifi-205-B) | 15.1 | 6 | P0DOV1 |
| Rer1 | Protein RER1 | 14.8 | 6 | Q9CQU3 |
| Mlec | Malectin | 14.4 | 6 | Q6ZQI3 |
| Rpl24 | 60S ribosomal protein L24 | 13.4 | 6 | Q8BP67 |
| Lmnb1 | Lamin-B1 | 13.3 | 6 | P14733 |
| Nop56 | Nucleolar protein 56 | 13.3 | 6 | Q9D6Z1 |
| Surf4 | Surfeit locus protein 4 | 13.0 | 6 | Q64310 |
| Irgm1 | Immunity-related GTPase family M protein 1 | 12.2 | 6 | Q60766 |
| Ezr | Ezrin | 11.8 | 6 | P26040 |
| P4ha1 | Prolyl 4-hydroxylase subunit alpha-1 (4-PH alpha-1) | 11.8 | 6 | Q60715 |
| Cct2 | T-complex protein 1 subunit beta (TCP-1-beta) | 10.7 | 6 | P80314 |
| Ifit3 group | Interferon-induced protein with tetratricopeptide repeats 3 (IFIT-3) | 10.7 | 6 | Q64345 |
| Pck2 | Phosphoenolpyruvate carboxykinase [GTP], mitochondrial (PEPCK-M) | 9.7 | 6 | Q8BH04 |
| Ilf3 | Interleukin enhancer-binding factor 3 | 9.7 | 6 | Q9Z1X4 |
| Sec11a | Signal peptidase complex catalytic subunit SEC11A | 9.5 | 6 | Q9R0P6 |
| Msn | Moesin | 9.2 | 6 | P26041 |
| Bag6 | Large proline-rich protein BAG6 | 8.8 | 6 | Q9Z1R2 |
| Tmpo | Lamina-associated polypeptide 2, isoforms alpha/zeta | 8.5 | 6 | Q61033 |
| Ppp2cb group | Serine/threonine-protein phosphatase 2A catalytic subunit beta isoform (PP2A-beta) | 8.4 | 6 | P62715 |
| Aldh18a1 | Gamma-glutamyl phosphate reductase | 7.9 | 6 | Q9Z110 |
| St13 | Hsc70-interacting protein (Hip) | 7.5 | 6 | Q99L47 |
| Gars | Glycine--tRNA ligase | 7.5 | 6 | Q9CZD3 |
| Hadhb | 3-ketoacyl-CoA thiolase | 6.9 | 6 | Q99JY0 |
| Cs | Citrate synthase, mitochondrial | 5.8 | 6 | Q9CZU6 |
| Acad9 | Acyl-CoA dehydrogenase family member 9, mitochondrial (ACAD-9) | 5.6 | 6 | Q8JZN5 |
| Copa | Proxenin | 5.4 | 6 | Q8CIE6 |
| Ipo7 | Importin-7 (Imp7) | 4.9 | 6 | Q9EPL8 |
| Rpl27 | 60S ribosomal protein L27 | 27.9 | 5 | P61358 |
| Myl12b | Myosin regulatory light chain 12B | 23.3 | 5 | Q3THE2 |
| Hmox1 | Heme oxygenase 1 (HO-1) | 22.8 | 5 | P14901 |
| Cbx3 | Chromobox protein homolog 3 | 21.3 | 5 | P23198 |
| Tpm4 | Tropomyosin alpha-4 chain | 20.6 | 5 | Q6IRU2 |
| Psma7 | Proteasome subunit alpha type-7 | 20.6 | 5 | Q9Z2U0 |
| Dad1 | Dolichyl-diphosphooligosaccharide--protein glycosyltransferase subunit DAD1 (Oligosaccharyl transferase subunit DAD1) | 19.5 | 5 | P61804 |
| Lman2 | Vesicular integral-membrane protein VIP36 | 19.3 | 5 | Q9DBH5 |
| Psmb5 | Proteasome subunit beta type-5 | 18.6 | 5 | O55234 |
| Ppib | Peptidyl-prolyl cis-trans isomerase B (PPIase B) | 18.5 | 5 | P24369 |
| Hnrnpc | Heterogeneous nuclear ribonucleoproteins C1/C2 (hnRNP C1/C2) | 16.6 | 5 | Q9Z204 |
| Prdx4 | Peroxiredoxin-4 | 15.7 | 5 | O08807 |
| Ldhb | L-lactate dehydrogenase B chain (LDH-B) | 14.4 | 5 | P16125 |
| Psma6 | Proteasome subunit alpha type-6 | 14.2 | 5 | Q9QUM9 |
| Lclat1 | Lysocardiolipin acyltransferase 1 | 14.1 | 5 | Q3UN02 |
| Tmed10 | Transmembrane emp24 domain-containing protein 10 | 12.8 | 5 | Q9D1D4 |
| Acadsb | Short/branched chain specific acyl-CoA dehydrogenase, mitochondrial (SBCAD) | 12.5 | 5 | Q9DBL1 |
| Ywhaq | 14-3-3 protein theta | 12.2 | 5 | P68254 |
| Nap1l1 | Nucleosome assembly protein 1-like 1 | 11.5 | 5 | P28656 |
| Scp2 | Non-specific lipid-transfer protein (NSL-TP) | 10.8 | 5 | P32020 |
| Elavl1 | ELAV-like protein 1 | 10.7 | 5 | P70372 |
| Ikbip | Inhibitor of nuclear factor kappa-B kinase-interacting protein (I kappa-B kinase-interacting protein; IKBKB-interacting protein; IKK-interacting protein) | 10.7 | 5 | Q9DBZ1 |
| Eif3l | Eukaryotic translation initiation factor 3 subunit L (eIF3l) | 10.6 | 5 | Q8QZY1 |
| H2afy2 | Core histone macro-H2A.2 (Histone macroH2A2; mH2A2) | 10.2 | 5 | Q8CCK0 |
| Dek | Protein DEK | 10.0 | 5 | Q7TNV0 |
| Acox1 | Peroxisomal acyl-coenzyme A oxidase 1 (AOX) | 9.5 | 5 | Q9R0H0 |
| Glud1 | Glutamate dehydrogenase 1, mitochondrial (GDH 1) | 9.3 | 5 | P26443 |
| Uso1 | General vesicular transport factor p115 | 9.3 | 5 | Q9Z1Z0 |
| Pdhb | Pyruvate dehydrogenase E1 component subunit beta, mitochondrial (PDHE1-B) | 8.9 | 5 | Q9D051 |
| Rdx | Radixin | 8.7 | 5 | P26043 |
| Psmd3 | 26S proteasome non-ATPase regulatory subunit 3 | 8.5 | 5 | P14685 |
| Letm1 | Mitochondrial proton/calcium exchanger protein | 8.0 | 5 | Q9Z2I0 |
| Tap1 | Antigen peptide transporter 1 (APT1) | 7.9 | 5 | P21958 |
| Snd1 | Staphylococcal nuclease domain-containing protein 1 | 7.9 | 5 | Q78PY7 |
| Rps2 | 40S ribosomal protein S2 | 7.8 | 5 | P25444 |
| Txlna | Alpha-taxilin | 7.6 | 5 | Q6PAM1 |
| Syncrip | Heterogeneous nuclear ribonucleoprotein Q (hnRNP Q) | 6.7 | 5 | Q7TMK9 |
| Slc25a12 | Calcium-binding mitochondrial carrier protein Aralar1 | 6.6 | 5 | Q8BH59 |
| Ddx17 | Probable ATP-dependent RNA helicase DDX17 | 5.8 | 5 | Q501J6 |
| Ifi204 | Interferon-activable protein 204 (Ifi-204) | 5.5 | 5 | P0DOV2 |
| Agps | Alkyldihydroxyacetonephosphate synthase, peroxisomal (Alkyl-DHAP synthase) | 5.3 | 5 | Q8C0I1 |
| Ap2b1 | AP-2 complex subunit beta | 5.1 | 5 | Q9DBG3 |
| Ap2a2 | AP-2 complex subunit alpha-2 | 4.9 | 5 | P17427 |
| Sf3b1 | Splicing factor 3B subunit 1 | 4.8 | 5 | Q99NB9 |
| Atp4a | Potassium-transporting ATPase alpha chain 1 | 4.6 | 5 | Q64436 |
| Tln1 | Talin-1 | 2.8 | 5 | P26039 |
| Dync1h1 | Cytoplasmic dynein 1 heavy chain 1 | 0.9 | 5 | Q9JHU4 |
| Atp5l | ATP synthase subunit g, mitochondrial (ATPase subunit g) | 33.0 | 4 | Q9CPQ8 |
| Sf3b5 | Splicing factor 3B subunit 5 (SF3b5) | 32.6 | 4 | Q923D4 |
| Vamp3 | Vesicle-associated membrane protein 3 (VAMP-3) | 32.0 | 4 | P63024 |
| Rps27l | 40S ribosomal protein S27-like | 28.6 | 4 | Q6ZWY3 |
| Pebp1 | Hippocampal cholinergic neurostimulating peptide | 28.3 | 4 | P70296 |
| Psma5 | Proteasome subunit alpha type-5 | 27.4 | 4 | Q9Z2U1 |
| Ube2v2 | Ubiquitin-conjugating enzyme E2 variant 2 | 22.1 | 4 | Q9D2M8 |
| Rpl17 | 60S ribosomal protein L17 | 21.7 | 4 | Q9CPR4 |
| Rhoc group | Rho-related GTP-binding protein RhoC | 20.7 | 4 | Q62159 |
| Vapa | Vesicle-associated membrane protein-associated protein A (VAMP-A; VAMP-associated protein A; VAP-A) | 18.1 | 4 | Q9WV55 |
| Q5I0W6_MOUSE group | na | 17.2 | 4 | Q5I0W6 |
| Tmem173 | Stimulator of interferon genes protein (mSTING) | 16.4 | 4 | Q3TBT3 |
| Rps25 | 40S ribosomal protein S25 | 16.0 | 4 | P62852 |
| Anxa4 | Annexin A4 | 16.0 | 4 | P97429 |
| Hmgb1 | High mobility group protein B1 | 15.8 | 4 | P63158 |
| Cox7a2 | Cytochrome c oxidase subunit 7A2, mitochondrial | 15.7 | 4 | P48771 |
| Sec22b | Vesicle-trafficking protein SEC22b | 15.3 | 4 | O08547 |
| Mtch1 | Mitochondrial carrier homolog 1 | 13.9 | 4 | Q791T5 |
| Sqor | Sulfide:quinone oxidoreductase, mitochondrial (SQOR) | 13.3 | 4 | Q9R112 |
| Aldh3a2 | Fatty aldehyde dehydrogenase | 12.0 | 4 | P47740 |
| Anxa5 | Annexin A5 | 11.6 | 4 | P48036 |
| Ddx6 | Probable ATP-dependent RNA helicase DDX6 | 11.6 | 4 | P54823 |
| Atp6v0c | V-type proton ATPase 16 kDa proteolipid subunit (V-ATPase 16 kDa proteolipid subunit) | 11.6 | 4 | P63082 |
| Rpl10 | 60S ribosomal protein L10 | 11.2 | 4 | Q6ZWV3 |
| Sntb2 | Beta-2-syntrophin | 11.0 | 4 | Q61235 |
| Pdha1 | Pyruvate dehydrogenase E1 component subunit alpha, somatic form, mitochondrial | 10.8 | 4 | P35486 |
| Hist1h1b | Histone H1.5 | 10.8 | 4 | P43276 |
| Cct6a | T-complex protein 1 subunit zeta (TCP-1-zeta) | 10.5 | 4 | P80317 |
| Derl1 | Derlin-1 | 10.0 | 4 | Q99J56 |
| Psmd6 | 26S proteasome non-ATPase regulatory subunit 6 | 10.0 | 4 | Q99JI4 |
| Cct7 | T-complex protein 1 subunit eta (TCP-1-eta) | 9.9 | 4 | P80313 |
| Tm9sf4 | Transmembrane 9 superfamily member 4 | 9.8 | 4 | Q8BH24 |
| Hars | Histidine--tRNA ligase, cytoplasmic | 9.2 | 4 | Q61035 |
| Stxbp2 | Syntaxin-binding protein 2 | 9.1 | 4 | Q64324 |
| Hnrnpf | Heterogeneous nuclear ribonucleoprotein F, N-terminally processed (hnRNP F) | 8.7 | 4 | Q9Z2X1 |
| Hnrnpdl | Heterogeneous nuclear ribonucleoprotein D-like (hnRNP D-like; hnRNP DL) | 8.6 | 4 | Q9Z130 |
| Tmem33 | Transmembrane protein 33 | 8.5 | 4 | Q9CR67 |
| Ilf2 | Interleukin enhancer-binding factor 2 | 8.2 | 4 | Q9CXY6 |
| Fscn1 | Fascin | 7.9 | 4 | Q61553 |
| Gnai3 | Guanine nucleotide-binding protein G(k) subunit alpha | 7.6 | 4 | Q9DC51 |
| Q9DCE9_MOUSE | na | 7.3 | 4 | Q9DCE9 |
| Rpn1 | Dolichyl-diphosphooligosaccharide--protein glycosyltransferase subunit 1 | 6.7 | 4 | Q91YQ5 |
| Serpinb6a | Serpin B6 | 6.6 | 4 | Q60854 |
| Trim28 | Transcription intermediary factor 1-beta (TIF1-beta) | 6.4 | 4 | Q62318 |
| Hacd3 | Very-long-chain (3R)-3-hydroxyacyl-CoA dehydratase 3 | 6.4 | 4 | Q8K2C9 |
| Parp1 | Poly [ADP-ribose] polymerase 1 (PARP-1) | 6.0 | 4 | P11103 |
| Mboat7 | Lysophospholipid acyltransferase 7 (LPLAT 7) | 5.9 | 4 | Q8CHK3 |
| E9QA15_MOUSE | na | 5.9 | 4 | E9QA15 |
| Sept8 | Septin-8 | 5.8 | 4 | Q8CHH9 |
| D1Pas1 group | Putative ATP-dependent RNA helicase Pl10 | 5.6 | 4 | P16381 |
| Sgpl1 | Sphingosine-1-phosphate lyase 1 (S1PL; SP-lyase 1; SPL 1; mSPL) | 5.5 | 4 | Q8R0X7 |
| Canx | Calnexin | 5.2 | 4 | P35564 |
| Psmd12 | 26S proteasome non-ATPase regulatory subunit 12 | 5.0 | 4 | Q9D8W5 |
| Vars | Valine--tRNA ligase | 4.9 | 4 | Q9Z1Q9 |
| Atp6v1a | V-type proton ATPase catalytic subunit A (V-ATPase subunit A) | 4.7 | 4 | P50516 |
| Sept10 | Septin-10 | 4.6 | 4 | Q8C650 |
| Lpcat3 | Lysophospholipid acyltransferase 5 (LPLAT 5) | 4.5 | 4 | Q91V01 |
| Copb2 | Coatomer subunit beta' | 4.4 | 4 | O55029 |
| Tmem214 | Transmembrane protein 214 | 4.4 | 4 | Q8BM55 |
| Eprs | Proline--tRNA ligase | 4.4 | 4 | Q8CGC7 |
| Psmd1 | 26S proteasome non-ATPase regulatory subunit 1 | 3.5 | 4 | Q3TXS7 |
| Emc1 | ER membrane protein complex subunit 1 | 3.2 | 4 | Q8C7X2 |
| Ermp1 | Endoplasmic reticulum metallopeptidase 1 | 2.6 | 4 | Q3UVK0 |
| Sptbn1 | Spectrin beta chain, non-erythrocytic 1 | 2.6 | 4 | Q62261 |
| Tns3 | Tensin-3 | 2.1 | 4 | Q5SSZ5 |
| Lama5 | Laminin subunit alpha-5 | 1.8 | 4 | Q61001 |
| Cdk13 | Cyclin-dependent kinase 13 | 1.3 | 4 | Q69ZA1 |
| Dsp | Desmoplakin (DP) | 1.1 | 4 | E9Q557 |
| Plec | Plectin (PCN; PLTN) | 1.1 | 4 | Q9QXS1 |
| B1AR51_MOUSE | na | 1.0 | 4 | B1AR51 |
| Cisd1 | CDGSH iron-sulfur domain-containing protein 1 | 34.3 | 3 | Q91WS0 |
| Cyb5b | Cytochrome b5 type B | 32.2 | 3 | Q9CQX2 |
| Rhog | Rho-related GTP-binding protein RhoG | 26.7 | 3 | P84096 |
| Cyb5a | Cytochrome b5 | 24.6 | 3 | P56395 |
| Snrpd3 | Small nuclear ribonucleoprotein Sm D3 (Sm-D3) | 24.6 | 3 | P62320 |
| Psmb4 | Proteasome subunit beta type-4 | 20.8 | 3 | P99026 |
| Agpat1 | 1-acyl-sn-glycerol-3-phosphate acyltransferase alpha | 20.4 | 3 | O35083 |
| Eef1b2 | Elongation factor 1-beta (EF-1-beta) | 20.4 | 3 | O70251 |
| Pip4p2 | Type 2 phosphatidylinositol 4,5-bisphosphate 4-phosphatase (Type 2 PtdIns-4,5-P2 4-Ptase) | 19.5 | 3 | Q9CZX7 |
| Glo1 | Lactoylglutathione lyase | 19.0 | 3 | Q9CPU0 |
| Ociad1 | OCIA domain-containing protein 1 | 19.0 | 3 | Q9CRD0 |
| Pgrmc2 | Membrane-associated progesterone receptor component 2 | 18.0 | 3 | Q80UU9 |
| Rpl21 | 60S ribosomal protein L21 | 16.2 | 3 | O09167 |
| Skp1a | S-phase kinase-associated protein 1 | 16.0 | 3 | Q9WTX5 |
| Rab11b group | Ras-related protein Rab-11B | 15.6 | 3 | P46638 |
| Erp29 | Endoplasmic reticulum resident protein 29 (ERp29) | 15.3 | 3 | P57759 |
| Calr | Calreticulin | 14.7 | 3 | P14211 |
| Rap1b | Ras-related protein Rap-1b | 14.1 | 3 | Q99JI6 |
| Ube2k | Ubiquitin-conjugating enzyme E2 K | 13.0 | 3 | P61087 |
| Erlin2 | Erlin-2 | 12.9 | 3 | Q8BFZ9 |
| Rab18 | Ras-related protein Rab-18 | 12.6 | 3 | P35293 |
| Cdc37 | Hsp90 co-chaperone Cdc37, N-terminally processed | 12.4 | 3 | Q61081 |
| Rab14 | Ras-related protein Rab-14 | 12.1 | 3 | Q91V41 |
| Echs1 | Enoyl-CoA hydratase, mitochondrial | 11.7 | 3 | Q8BH95 |
| Prmt1 | Protein arginine N-methyltransferase 1 | 11.6 | 3 | Q9JIF0 |
| Ecsit | Evolutionarily conserved signaling intermediate in Toll pathway, mitochondrial | 11.5 | 3 | Q9QZH6 |
| Cdipt | CDP-diacylglycerol--inositol 3-phosphatidyltransferase | 11.3 | 3 | Q8VDP6 |
| Mat2b | Methionine adenosyltransferase 2 subunit beta | 11.1 | 3 | Q99LB6 |
| Stom | Erythrocyte band 7 integral membrane protein | 10.9 | 3 | P54116 |
| Rps6 | 40S ribosomal protein S6 | 10.8 | 3 | P62754 |
| Rab6a group | Ras-related protein Rab-6A (Rab-6) | 10.6 | 3 | P35279 |
| Psmc5 | 26S proteasome regulatory subunit 8 | 10.6 | 3 | P62196 |
| Actr2 | Actin-related protein 2 | 10.4 | 3 | P61161 |
| Flot1 | Flotillin-1 | 10.3 | 3 | O08917 |
| Ckb | Creatine kinase B-type | 10.0 | 3 | Q04447 |
| Pcyox1l | Prenylcysteine oxidase-like | 9.9 | 3 | Q8C7K6 |
| Psmc2 | 26S proteasome regulatory subunit 7 | 9.7 | 3 | P46471 |
| Spg21 | Maspardin | 9.7 | 3 | Q9CQC8 |
| Uqcrc2 | Cytochrome b-c1 complex subunit 2, mitochondrial | 9.7 | 3 | Q9DB77 |
| Blvra | Biliverdin reductase A (BVR A) | 9.5 | 3 | Q9CY64 |
| Pa2g4 | Proliferation-associated protein 2G4 | 9.4 | 3 | P50580 |
| Capza2 | F-actin-capping protein subunit alpha-2 | 9.1 | 3 | P47754 |
| Adpgk | ADP-dependent glucokinase (ADP-GK; ADPGK) | 9.1 | 3 | Q8VDL4 |
| Atp1b1 | Sodium/potassium-transporting ATPase subunit beta-1 | 8.9 | 3 | P14094 |
| Luc7l3 | Luc7-like protein 3 | 8.8 | 3 | Q5SUF2 |
| Capza1 | F-actin-capping protein subunit alpha-1 | 8.7 | 3 | P47753 |
| Tcp1 | T-complex protein 1 subunit alpha (TCP-1-alpha) | 8.6 | 3 | P11983 |
| Rnh1 | Ribonuclease inhibitor | 8.6 | 3 | Q91VI7 |
| Rfc2 | Replication factor C subunit 2 | 8.6 | 3 | Q9WUK4 |
| Uqcrc1 | Cytochrome b-c1 complex subunit 1, mitochondrial | 8.3 | 3 | Q9CZ13 |
| Acaa2 | 3-ketoacyl-CoA thiolase, mitochondrial | 8.1 | 3 | Q8BWT1 |
| Trabd | TraB domain-containing protein | 8.0 | 3 | Q99JY4 |
| Tgm2 | Protein-glutamine gamma-glutamyltransferase 2 | 7.9 | 3 | P21981 |
| Letmd1 | LETM1 domain-containing protein 1 | 7.8 | 3 | Q924L1 |
| Lbr | Lamin-B receptor | 7.7 | 3 | Q3U9G9 |
| Cavin1 | Caveolae-associated protein 1 | 7.4 | 3 | O54724 |
| Myg1 | UPF0160 protein MYG1, mitochondrial | 7.4 | 3 | Q9JK81 |
| Lta4h | Leukotriene A-4 hydrolase (LTA-4 hydrolase) | 7.2 | 3 | P24527 |
| Cops4 | COP9 signalosome complex subunit 4 (SGN4; Signalosome subunit 4) | 7.1 | 3 | O88544 |
| Hmgcll1 | 3-hydroxymethyl-3-methylglutaryl-CoA lyase, cytoplasmic | 7.0 | 3 | Q8JZS7 |
| Rbmxl1 group | RNA binding motif protein, X-linked-like-1 | 7.0 | 3 | Q91VM5 |
| Fads1 | Fatty acid desaturase 1 | 6.9 | 3 | Q920L1 |
| Gnb2 | Guanine nucleotide-binding protein G(I)/G(S)/G(T) subunit beta-2 | 6.8 | 3 | P62880 |
| Abhd6 | Monoacylglycerol lipase ABHD6 | 6.8 | 3 | Q8R2Y0 |
| Sfxn1 | Sideroflexin-1 | 6.8 | 3 | Q99JR1 |
| Fech | Ferrochelatase, mitochondrial | 6.7 | 3 | P22315 |
| Acp6 | Lysophosphatidic acid phosphatase type 6 | 6.7 | 3 | Q8BP40 |
| Eif3m | Eukaryotic translation initiation factor 3 subunit M (eIF3m) | 6.7 | 3 | Q99JX4 |
| Atp6v0d1 | V-type proton ATPase subunit d 1 (V-ATPase subunit d 1) | 6.6 | 3 | P51863 |
| Clptm1 | Cleft lip and palate transmembrane protein 1 homolog | 6.5 | 3 | Q8VBZ3 |
| Cdk1 group | Cyclin-dependent kinase 1 (CDK1) | 6.4 | 3 | P11440 |
| Slc25a1 | Tricarboxylate transport protein, mitochondrial | 6.4 | 3 | Q8JZU2 |
| Lman1 | Protein ERGIC-53 | 6.4 | 3 | Q9D0F3 |
| Nedd4 | E3 ubiquitin-protein ligase NEDD4 | 6.3 | 3 | P46935 |
| Slc44a1 | Choline transporter-like protein 1 | 6.0 | 3 | Q6X893 |
| Acadl | Long-chain specific acyl-CoA dehydrogenase, mitochondrial (LCAD) | 5.8 | 3 | P51174 |
| Atp6v1h | V-type proton ATPase subunit H (V-ATPase subunit H) | 5.8 | 3 | Q8BVE3 |
| Soat1 | Sterol O-acyltransferase 1 | 5.6 | 3 | Q61263 |
| Immt | MICOS complex subunit Mic60 | 5.4 | 3 | Q8CAQ8 |
| Col4a3bp | Collagen type IV alpha-3-binding protein | 5.1 | 3 | Q9EQG9 |
| Ddost | Dolichyl-diphosphooligosaccharide--protein glycosyltransferase 48 kDa subunit (DDOST 48 kDa subunit; Oligosaccharyl transferase 48 kDa subunit) | 5.0 | 3 | O54734 |
| Gpr39 | G-protein coupled receptor 39 | 5.0 | 3 | Q5U431 |
| Gpc6 | Secreted glypican-6 | 5.0 | 3 | Q9R087 |
| Pex11b group | Peroxisomal membrane protein 11B | 4.6 | 3 | Q9Z210 |
| Ipo5 | Importin-5 (Imp5) | 4.5 | 3 | Q8BKC5 |
| Ctnnb1 | Catenin beta-1 | 3.8 | 3 | Q02248 |
| Acsl4 | Long-chain-fatty-acid--CoA ligase 4 | 3.7 | 3 | Q9QUJ7 |
| Sf3b3 | Splicing factor 3B subunit 3 | 3.6 | 3 | Q921M3 |
| Acsl3 | Long-chain-fatty-acid--CoA ligase 3 | 3.6 | 3 | Q9CZW4 |
| Mybbp1a | Myb-binding protein 1A | 3.5 | 3 | Q7TPV4 |
| Hdlbp | Vigilin | 3.5 | 3 | Q8VDJ3 |
| Fgfr2 | Fibroblast growth factor receptor 2 (FGFR-2) | 3.4 | 3 | P21803 |
| Hsd17b4 | Enoyl-CoA hydratase 2 | 3.4 | 3 | P51660 |
| Gnas | Guanine nucleotide-binding protein G(s) subunit alpha isoforms XLas | 3.4 | 3 | Q6R0H7 |
| Cand1 | Cullin-associated NEDD8-dissociated protein 1 | 3.3 | 3 | Q6ZQ38 |
| Lamc1 | Laminin subunit gamma-1 | 3.2 | 3 | P02468 |
| Col20a1 | Collagen alpha-1(XX) chain | 2.9 | 3 | Q923P0 |
| Npepps | Puromycin-sensitive aminopeptidase (PSA) | 2.5 | 3 | Q11011 |
| Cul4b | Cullin-4B (CUL-4B) | 2.4 | 3 | A2A432 |
| Atp13a1 | Manganese-transporting ATPase 13A1 (CATP) | 2.0 | 3 | Q9EPE9 |
| Lrpprc | Leucine-rich PPR motif-containing protein, mitochondrial | 1.9 | 3 | Q6PB66 |
| Naca | Nascent polypeptide-associated complex subunit alpha, muscle-specific form | 1.3 | 3 | P70670 |
| Hspg2 | LG3 peptide (HSPG) | 1.2 | 3 | Q05793 |
| Cit | Citron Rho-interacting kinase (CRIK) | 0.8 | 3 | P49025 |
| Rps21 | 40S ribosomal protein S21 | 27.7 | 2 | Q9CQR2 |
| Ndufa4 | Cytochrome c oxidase subunit NDUFA4 | 26.8 | 2 | Q62425 |
| Snu13 | NHP2-like protein 1, N-terminally processed | 18.8 | 2 | Q9D0T1 |
| Atp5h | ATP synthase subunit d, mitochondrial (ATPase subunit d) | 18.0 | 2 | Q9DCX2 |
| Park7 | Protein/nucleic acid deglycase DJ-1 | 16.4 | 2 | Q99LX0 |
| Arl6ip5 | PRA1 family protein 3 | 16.0 | 2 | Q8R5J9 |
| Tmco1 | Calcium load-activated calcium channel (CLAC channel) | 15.4 | 2 | Q921L3 |
| Pgam1 | Phosphoglycerate mutase 1 | 14.2 | 2 | Q9DBJ1 |
| Ssr4 | Translocon-associated protein subunit delta (TRAP-delta) | 14.0 | 2 | Q62186 |
| Eef1d | Elongation factor 1-delta (EF-1-delta) | 12.8 | 2 | P57776 |
| Chchd3 | MICOS complex subunit Mic19 | 11.5 | 2 | Q9CRB9 |
| Anp32a | Acidic leucine-rich nuclear phosphoprotein 32 family member A | 10.9 | 2 | O35381 |
| Rbm8a | RNA-binding protein 8A | 10.9 | 2 | Q9CWZ3 |
| Mtap | S-methyl-5'-thioadenosine phosphorylase | 9.9 | 2 | Q9CQ65 |
| March5 | E3 ubiquitin-protein ligase MARCH5 | 9.7 | 2 | Q3KNM2 |
| Srsf6 | Serine/arginine-rich splicing factor 6 | 9.4 | 2 | Q3TWW8 |
| Scamp3 | Secretory carrier-associated membrane protein 3 (Secretory carrier membrane protein 3) | 9.2 | 2 | O35609 |
| Eif3e | Eukaryotic translation initiation factor 3 subunit E (eIF3e) | 9.0 | 2 | P60229 |
| Actr1a | Alpha-centractin (Centractin) | 8.5 | 2 | P61164 |
| Psen2 | Presenilin-2 CTF subunit (PS-2) | 8.5 | 2 | Q61144 |
| Serbp1 | Plasminogen activator inhibitor 1 RNA-binding protein | 8.4 | 2 | Q9CY58 |
| Arpc1b | Actin-related protein 2/3 complex subunit 1B | 8.3 | 2 | Q9WV32 |
| Dctn2 | Dynactin subunit 2 | 8.2 | 2 | Q99KJ8 |
| Fkbp8 | Peptidyl-prolyl cis-trans isomerase FKBP8 (PPIase FKBP8) | 8.0 | 2 | O35465 |
| Prkra | Interferon-inducible double-stranded RNA-dependent protein kinase activator A | 8.0 | 2 | Q9WTX2 |
| O08804_MOUSE | na | 8.0 | 2 | O08804 |
| Atp5c1 | ATP synthase subunit gamma, mitochondrial | 7.7 | 2 | Q91VR2 |
| Mtx1 | Metaxin-1 | 7.6 | 2 | P47802 |
| Mat2a | S-adenosylmethionine synthase isoform type-2 (AdoMet synthase 2) | 7.6 | 2 | Q3THS6 |
| Fbl | rRNA 2'-O-methyltransferase fibrillarin | 7.3 | 2 | P35550 |
| Nucb1 | Nucleobindin-1 | 7.2 | 2 | Q02819 |
| Suclg2 | Succinate--CoA ligase [GDP-forming] subunit beta, mitochondrial | 7.2 | 2 | Q9Z2I8 |
| Plin3 | Perilipin-3 | 6.9 | 2 | Q9DBG5 |
| Psmc3 | 26S proteasome regulatory subunit 6A | 6.8 | 2 | O88685 |
| Tecr | Very-long-chain enoyl-CoA reductase | 6.8 | 2 | Q9CY27 |
| Nars | Asparagine--tRNA ligase, cytoplasmic | 6.6 | 2 | Q8BP47 |
| Pafah1b1 | Platelet-activating factor acetylhydrolase IB subunit alpha | 6.3 | 2 | P63005 |
| Agpat4 | 1-acyl-sn-glycerol-3-phosphate acyltransferase delta | 5.8 | 2 | Q8K4X7 |
| Tmem109 | Transmembrane protein 109 | 5.3 | 2 | Q3UBX0 |
| Far1 | Fatty acyl-CoA reductase 1 | 4.9 | 2 | Q922J9 |
| Rars | Arginine--tRNA ligase, cytoplasmic | 4.8 | 2 | Q9D0I9 |
| Sccpdh | Saccharopine dehydrogenase-like oxidoreductase | 4.7 | 2 | Q8R127 |
| Cat | Catalase | 4.6 | 2 | P24270 |
| Stt3b | Dolichyl-diphosphooligosaccharide--protein glycosyltransferase subunit STT3B (Oligosaccharyl transferase subunit STT3B; STT3-B) | 4.3 | 2 | Q3TDQ1 |
| Lmnb2 | Lamin-B2 | 4.0 | 2 | P21619 |
| Por | NADPH--cytochrome P450 reductase (CPR; P450R) | 4.0 | 2 | P37040 |
| Abcb7 | ATP-binding cassette sub-family B member 7, mitochondrial | 4.0 | 2 | Q61102 |
| Snx9 | Sorting nexin-9 | 3.9 | 2 | Q91VH2 |
| Atl3 | Atlastin-3 | 3.5 | 2 | Q91YH5 |
| Copg1 | Coatomer subunit gamma-1 | 3.3 | 2 | Q9QZE5 |
| Mcm2 | DNA replication licensing factor MCM2 | 3.1 | 2 | P97310 |
| Lamp1 | Lysosome-associated membrane glycoprotein 1 (LAMP-1; Lysosome-associated membrane protein 1) | 3.0 | 2 | P11438 |
| Map1s | MAP1S light chain | 3.0 | 2 | Q8C052 |
| Zfr | Zinc finger RNA-binding protein | 2.8 | 2 | O88532 |
| Ctnna1 | Catenin alpha-1 | 2.8 | 2 | P26231 |
| Sdha | Succinate dehydrogenase [ubiquinone] flavoprotein subunit, mitochondrial | 2.6 | 2 | Q8K2B3 |
| Dhx15 | Pre-mRNA-splicing factor ATP-dependent RNA helicase DHX15 | 2.5 | 2 | O35286 |
| Gaa | Lysosomal alpha-glucosidase | 2.5 | 2 | P70699 |
| Glg1 | Golgi apparatus protein 1 | 2.4 | 2 | Q61543 |
| Man2a1 | Alpha-mannosidase 2 | 2.1 | 2 | P27046 |
| Lamb1 | Laminin subunit beta-1 | 1.6 | 2 | P02469 |
| Hyou1 | Hypoxia up-regulated protein 1 (GRP-170) | 1.2 | 2 | Q9JKR6 |
| Cttn | Src substrate cortactin | 4.8 | 1 | Q60598 |

**Table S2.** Tanimoto similarity index (SI) and predicted interaction energy for the compounds sharing similarity with 14,15-EET

| **Molecule** | **SI** | **Docking energy (kcal/mol)** |
| --- | --- | --- |
| **14,15-EET**  **** | 1.000 | -8.7 |
| **Mead acid**  **** | 0.276 | -7.33 |
| **15-KETE**  **** | 0.262 | -7.77 |
| **15-HEIA**  **** | 0.260 | -8.23 |
| **16-HETE**  **** | 0.260 | -8.28 |
| **15-HETE**  **** | 0.256 | -8.62 |
| **14,15-DHET**  **** | 0.256 | -8.47 |
| **17-HETE**  **** | 0.254 | -8.34 |

Higher SI index correspond to higher similarity; more negative docking energy is the favorable interaction between receptor and ligands docked.

**Table S3.** Identity and similarity index

| **SS** | **ID%** | **Sim.%** |
| --- | --- | --- |
| N-ter* | 0 | 22.2 |
| TM1 | 35.7 | 64.3 |
| TM2 | 50 | 73.5 |
| EC1 | 0 | 12.5 |
| TM3 | 51.4 | 71.4 |
| IC2 | 28.6 | 57.1 |
| TM4 | 45 | 85 |
| EC2* | 26.7 | 46.7 |
| TM5 | 20 | 51.4 |
| TM6 | 31.4 | 62.9 |
| EC3 | 28.6 | 42.9 |
| TM7 | 36.8 | 63.2 |

Values are calculated between target (GPR39) and template (NTRS1) sequence alignment used as an input to MODELLER program. * Partial alignment

**References**

1. D. S. Wishart *et al.*, HMDB 3.0--The Human Metabolome Database in 2013. *Nucleic Acids Res* **41**, D801-807 (2013).

2. D. S. Wishart *et al.*, HMDB: a knowledgebase for the human metabolome. *Nucleic Acids Res* **37**, D603-610 (2009).

3. D. S. Wishart *et al.*, HMDB: the Human Metabolome Database. *Nucleic Acids Res* **35**, D521-526 (2007).

4. J. Duan, S. L. Dixon, J. F. Lowrie, W. Sherman, Analysis and comparison of 2D fingerprints: insights into database screening performance using eight fingerprint methods. *J Mol Graph Model* **29**, 157-170 (2010).

5. J. F. White *et al.*, Structure of the agonist-bound neurotensin receptor. *Nature* **490**, 508-513 (2012).

6. A. Sali, T. L. Blundell, Comparative protein modelling by satisfaction of spatial restraints. *J Mol Biol* **234**, 779-815 (1993).

7. J. C. Phillips *et al.*, Scalable molecular dynamics with NAMD. *J Comput Chem* **26**, 1781-1802 (2005).

8. B. R. Brooks *et al.*, CHARMM: the biomolecular simulation program. *J Comput Chem* **30**, 1545-1614 (2009).

9. J. M. Word, S. C. Lovell, J. S. Richardson, D. C. Richardson, Asparagine and glutamine: using hydrogen atom contacts in the choice of side-chain amide orientation. *J Mol Biol* **285**, 1735-1747 (1999).

10. J. Lee *et al.*, CHARMM-GUI Input Generator for NAMD, GROMACS, AMBER, OpenMM, and CHARMM/OpenMM Simulations Using the CHARMM36 Additive Force Field. *J Chem Theory Comput* **12**, 405-413 (2016).

11. J.-P. Ryckaert, G. Ciccotti, H. J. C. Berendsen, Numerical integration of the cartesian equations of motion of a system with constraints: molecular dynamics of n-alkanes. *Journal of Computational Physics* **23**, 327-341 (1977).

12. W. Sherman, H. S. Beard, R. Farid, Use of an induced fit receptor structure in virtual screening. *Chem Biol Drug Des* **67**, 83-84 (2006).

13. W. Sherman, T. Day, M. P. Jacobson, R. A. Friesner, R. Farid, Novel procedure for modeling ligand/receptor induced fit effects. *J Med Chem* **49**, 534-553 (2006).

14. R. A. Friesner *et al.*, Glide: a new approach for rapid, accurate docking and scoring. 1. Method and assessment of docking accuracy. *J Med Chem* **47**, 1739-1749 (2004).

15. R. A. Friesner *et al.*, Extra precision glide: docking and scoring incorporating a model of hydrophobic enclosure for protein-ligand complexes. *J Med Chem* **49**, 6177-6196 (2006).

16. T. A. Halgren *et al.*, Glide: a new approach for rapid, accurate docking and scoring. 2. Enrichment factors in database screening. *J Med Chem* **47**, 1750-1759 (2004).
